1 Bioconversion of pomegranate residues into biofuels and bioactive lipids

2

3 Marianna Dourou<sup>a</sup>, Christina N. Economou<sup>b</sup>, Lida Aggeli<sup>a,b</sup>, Miroslav Janák<sup>a,#</sup>, Gabriela

4 Valdés<sup>a,&</sup>, Nefeli Elezi<sup>a</sup>, Dimitrios Kakavas<sup>a</sup>, Theodore Papageorgiou<sup>a</sup>, Dimitrios V.

5 Vayenas<sup>b</sup>, Milan Certik<sup>c</sup>, George Aggelis<sup>a,\*</sup>

6

7 <sup>a</sup>Division of Genetics, Cell and Developmental Biology, Department of Biology, University

8 of Patras 26504, Patras, Greece

9 <sup>b</sup>Department of Chemical Engineering, University of Patras 26504, Patras, Greece

10 <sup>c</sup>Institute of Biotechnology, Faculty of Chemical and Food Technology, Slovak University of

11 Technology, Bratislava 81237, Slovak Republic

12

13 \*Corresponding author: Email address: [George.Aggelis@upatras.gr](mailto:George.Aggelis@upatras.gr); Tel (+30) 2610969232

14

15 <sup>#</sup>Current address: Institute of Biotechnology, Faculty of Chemical and Food Technology,

16 Slovak University of Technology, Bratislava 81237, Slovak Republic

17 <sup>&</sup>Current address: Centro Regional de Investigación e Innovación para la Sostenibilidad de la

18 Agricultura y los Territorios Rurales (CERES), Pontificia Universidad Católica de

19 Valparaíso, Valparaíso 2340000, Chile.

20

21 Author contributions: M.D.: Methodology; Validation; Formal analysis; Writing - Original

22 Draft; Visualization; C.N.E.: Validation; Formal analysis; Writing - Original Draft; L.A.:

23 Methodology; Formal analysis; Investigation; M.J.: Methodology; Investigation; G.V.:

24 Investigation; N.E.: Investigation; D.K.: Investigation; Th.P.: Investigation; D.V.V.:

25 Supervision; M.C.: Supervision; G.A.: Conceptualization; Writing - Review & Editing;

26 Supervision

27 **Abstract**

28 Pomegranate residues (PRs) (i.e. the solid residues remaining after juice extraction),  
29 generated currently in abundance in Greece, contain a variety of carbon sources and therefore  
30 can be regarded as a potential feedstock for chemical and biotechnological processes rather  
31 than as waste materials. In the current project, the polysaccharides contained in PRs were  
32 extracted and hydrolyzed in a one-step process without the use of chemical reagents and the  
33 resulting broth was used as substrate in biotechnological applications, including ethanol and  
34 single cell oil (SCO) production. The yeasts *Meyerozyma guilliermondii*, *Scheffersomyces*  
35 *coipomoensis*, *Sugiyamaella paludigena* and especially *Saccharomyces cerevisiae*, were able  
36 to efficiently convert PR derived reducing sugars into bioethanol. Ethanol production under  
37 anaerobic conditions ranged from 3.6 to 12.5 g/L. In addition, the oleaginous yeasts  
38 *Lipomyces lipofer* and *Yarrowia lipolytica* as well as *M. guilliermondii*, *S. coipomoensis* and  
39 *S. paludigena* were tested for their ability to accumulate lipids suitable as feedstock for  
40 biodiesel production. Lipids were accumulated at concentrations up to 18% and were rich in  
41 palmitic acid (C16:0) and oleic acid (C18:1). Finally, the oleaginous fungus *Cunnichamella*  
42 *echinulata* was cultivated on PR based solid substrates for  $\gamma$ -linolenic acid (GLA) production.  
43 The fermented bio-products (i.e. fermented substrate plus fungal mycelia) contained up to 4.8  
44 mg GLA/g of dry weight. Phenolic removal (up to 30%) was achieved by several of the above  
45 mentioned microorganisms, including *C. echinulata*, *L. lipofer*, *M. guilliermondii*, *S.*  
46 *paludigena* and *Y. lipolytica*. We conclude that PRs can be used as a raw material for  
47 microbial growth, ethanol and SCO production, which is of economic and environmental  
48 importance.

49

50 **Keywords:** pomegranate residues; bioethanol; *Saccharomyces cerevisiae*; modelling;  
51 microbial lipids; *Cunnighamella echinulata*

52

- 53    **Abbreviations:** FA, fatty acid; GLA,  $\gamma$ -linolenic acid; OFs, oat flakes; PRs, pomegranate  
54    residues; PUFAs, polyunsaturated fatty acids; R.S., reducing sugars; SCOs, single cell oil;  
55    SSF, Solid-state fermentation; TAGs, triacylglycerols; T.S., total sugars; WB, wheat bran

56 1. Introduction

57 Agriculture is a very important economic activity that boosts prosperity and contributes to  
58 tackling poverty in many countries. According to The World Bank collection, agricultural  
59 activity worldwide in 2017 accounted for 3.43% of the gross domestic product (GDP).  
60 Specifically for Greece, in 2018 the agricultural domestic product represented 3.72%, of  
61 GDP, twice as much as in other European countries, while together with processing,  
62 nowadays exceeds 8% (World Bank, September 2020). However, the expansion and  
63 modernization of the agricultural sector, and especially the processing of agricultural  
64 products, has caused environmental concerns, due to the inevitable co-production of residues  
65 and wastewaters, which are produced in huge quantities annually. Besides, water use in  
66 agriculture accounts for 70% of total water use globally.

67 Two different types of agro-industrial residues exist, namely field plant residues,  
68 which include remaining plant parts (e.g. leaves, straw, stalks, seeds, roots etc.), and industrial  
69 residues, which include organic matter or plant parts produced by food and fruit industries  
70 (e.g. molasses, peels, fruit marc and seeds and fruit pulp) (Sadh et al., 2018). Among residues,  
71 lignocellulosic biomass is the most abundant residue worldwide, and although it can be  
72 considered as a promising cost-effective fermentation feedstock (Diwan and Gupta, 2019;  
73 Valdés et al., 2020b, 2020a), is treated as waste in many countries (Arevalo-Gallegos et al.,  
74 2017). The uncontrollable disposal of agro-industrial residues, especially those produced  
75 during industrial processing, to the landfills without any treatment, can cause environmental  
76 pollution on the surrounded areas and harmful effects on human and animal health (Ghinea et  
77 al., 2019).

78 The use of the lignocellulosic material as a substrate in biotechnological applications  
79 requires additional pretreatment phases, to make it fermentable (Caporusso et al., 2021;  
80 Mosier, 2005; Sarris and Papanikolaou, 2016; Valdés et al., 2020a), which increases the cost  
81 of the whole process. Lignocellulosic biomass consists of cellulose, hemicellulose and lignin.  
82 During the pretreatment procedure, lignin “seal” is removed and cellulose is released and  
83 becomes accessible for hydrolysis (Haghighi Mood et al., 2013; Sánchez and Cardona, 2008).

84 Pretreatment methods are categorized in four groups, i.e. physical (i.e. grinding and milling,  
85 microwave irradiation, mechanical extrusion, freeze pretreatment), chemical (in an acid or an  
86 alkaline environment), physico-chemical (using steam explosion, hot water, wet oxidation and  
87 CO<sub>2</sub> explosion) and biochemical (using microorganisms and enzymes) (Haghighi Mood et al.,  
88 2013; Sarkar et al., 2012). Lately, combination of two of the above mentioned methods is  
89 proposed to increase the efficiency of the process. The first step of pretreatment involves  
90 lignin destruction, followed by hydrolysis of cellulose using acids or enzymes, resulting in the  
91 release of fermentable sugars (Sánchez and Cardona, 2008). Usually, glucose and xylose are  
92 extracted from lignocellulosic biomass. Thus, microorganisms that can utilize both C-5 and  
93 C-6 sugars are highly desired to increase the fermentation efficiency for the production of  
94 valuable metabolic products, including ethanol and lipids, from such materials (Diwan and  
95 Gupta, 2020).

96         The last decade the popularity of pomegranate products (mainly fresh fruit and juice)  
97 has increased tremendously thanks to their nutritional value and benefits to human health.  
98 Many reports describe the antimicrobial, antiviral, anticancer, antioxidant and antimutagenic  
99 properties of the various parts of the plant. (Akhtar et al., 2015; Bassiri-Jahromi, 2018;  
100 Hasnaoui et al., 2014; Joseph et al., 2013; Sharma et al., 2017). As a result, pomegranate  
101 cultivation has increased significantly worldwide to meet the growing demand. For instance,  
102 in Greece this crop extended up to 700-800 acres until 2007 and nowadays has reached  
103 15.000 acres, yielding 30.000 tons of fruits per year. Consequently, the pomegranate  
104 processing industry has significantly expanded, and its negative outputs have already  
105 appeared (Kaderides et al., 2015). It has been estimated that the production of each ton of  
106 concentrated to 65 Brix pomegranate juice generates up to 5–5.5 tons of pomegranate  
107 residues (PRs) (i.e. pomegranate peels and seeds) (Hasnaoui et al., 2014). Although PRs is an  
108 excellent source of sugars, such as ribose, glucuronic acid, galacturonic acid, L-rhamnose, D-  
109 fucose, L-arabinose, D-xylose, D-mannose, D-galactose and D-glucose (Zhai et al., 2018a,  
110 2018b) and numerous bioactive compounds (Santos et al., 2019; Sood and Gupta, 2015), in  
111 practice they are usually left unexploited and only a small amount is used as a soil conditioner

112 (after composting), as fuel (in the form of dry pellets), as animal feed or for the recovery of  
113 pharmaceuticals and cosmetics (Goula et al., 2017; Pathak et al., 2017; Pereira et al., 2016;  
114 Pocan et al., 2018; Siddiqui et al., 2019). On the other hand, the necessity for low-cost and  
115 environmentally friendly substrates suitable for microbial processes related to the production  
116 of high value-added products (i.e. biofuels, single cell oils, single cell protein, enzymes,  
117 pigments, organic acids, etc.), has been arisen.

118 Biofuels (mainly bioethanol and biodiesel) are renewable, cost-effective and  
119 environmentally friendly energy sources alternative to fossil fuels, which has attracted the  
120 interest of many countries in the context of the diminishing oil dependence and eliminating  
121 the adverse effects of its use on global warming. Therefore, the demand for biofuels is  
122 gradually increasing worldwide. Specifically, bioethanol apart from its variety of commercial  
123 applications in cosmetology and in food and pharmaceutical industry, is also widely used as  
124 an engine fuel, on its own, or blended with gasoline. However, the utilization of the so-called  
125 “1<sup>st</sup> generation” bioethanol, deriving from the fermentation of hydrolyzed corn starch or  
126 sucrose juice, runs into the “food vs fuel” dilemma (Gray et al., 2006), therefore the  
127 production of the so-called “2<sup>nd</sup> generation” bioethanol (deriving through the valorization of  
128 waste streams) is considered as a very important scientific priority worldwide (Rastogi and  
129 Shrivastava, 2017; Sarkar et al., 2012; Tian and Chen, 2016). On the other hand, biodiesel  
130 produced by a variety of renewable resources (i.e. plant or animal fats) (Banković-Ilić et al.,  
131 2014; Gutiérrez et al., 2017), is non-toxic, biodegradable, and has a favorable emission  
132 profile, but, being potentially competitive in food production, it faces similar criticism to that  
133 of the “1<sup>st</sup> generation” bioethanol. Alternatively, waste fats can be considered, with some  
134 restrictions, as a raw material for the production of biodiesel, and this option has aroused  
135 great interest in many countries. Besides, microbial oil, so-called single cell oil (SCO),  
136 produced from yeasts cultivated on agro-industrial residues, presenting a fatty acid (FA)  
137 composition similar to that of common vegetable oils, could be considered shortly as  
138 feedstock in the biodiesel manufacture (Dourou et al., 2018; Li et al., 2008; Papanikolaou and  
139 Aggelis, 2011a, 2011b; Singh and Gu, 2010; Wei et al., 2017). Contrary to yeast-derived

140 SCOs, fungi- and microalgae-derived SCOs are of pharmaceutical and dietary interest thanks  
141 to the presence of polyunsaturated fatty acids (PUFAs), such as  $\gamma$ -linolenic acid (GLA, C18:3,  
142 n-6), stearidonic (SDA, C18:4, n-3), arachidonic acid (ARA, C20:4, n- 6), eicosapentaenoic  
143 acid (EPA, C20:5, n-3), docosapentaenoic acid (DPA, C22:5, n-3) and docosahexaenoic acid  
144 (DHA, C22:6, n- 3) (Bellou et al., 2016; Fakas et al., 2009; Slaný et al., 2021).

145 A significant part of the production costs of both ethanol and SCO refers to the  
146 substrate cost suggesting that a choice of a low-cost material as substrate, such as a carbon-  
147 rich agro-industrial residue, is crucial for the process sustainability (Dourou et al., 2016;  
148 Osorio-González et al., 2019; Sarris et al., 2013). Moreover, new strategies using  
149 microorganisms derived after genetic engineering and/or adaptive laboratory evolution  
150 approaches, used to increase the efficiency of substrate assimilation and metabolite  
151 production, can contribute to the success of the process (da Silveira et al., 2020; Daskalaki et  
152 al., 2019; De Melo et al., 2020; Dourou et al., 2018; Li et al., 2019).

153 The aim of the current investigation was to study the conversion of PRs into high  
154 added value microbial products, i.e. ethanol and SCOs, using technologically suitable  
155 microbial strains in an integrated approach, which includes an efficient and environmentally  
156 friendly pretreatment followed by the production of microbial metabolic products, while  
157 minimizing management issues caused by PR disposal into the environment. The yeasts  
158 *Candida tropicalis*, *Lipomyces lipofer*, *Meyerozyma guilliermondii*, *Saccharomyces*  
159 *cerevisiae*, *Scheffersomyces coipomoensis*, *Sugiyamaella paludigena* and *Yarrowia lipolytica*  
160 were tested for their ability to grow on PR extract and produce ethanol and/or SCOs. Solid  
161 state fermentations (SSFs) of the fungus *Cunninghamella echinulata* were performed using  
162 PRs alone or in combination with wheat bran (WB) or oat flakes (OFs) as substrate. The final  
163 fermented product was enriched with polyunsaturated FAs, thus having a potential value used  
164 in animal or human nutrition. We conclude that PRs and PR extract are suitable microbial  
165 substrates and can be used as raw material in various biotechnological applications.

166

167 2. Material and Methods

168 2.1 Microorganisms and culture conditions

169 The following yeast strains were used: *Saccharomyces cerevisiae* AXAZ-1, *Candida*  
170 *tropicalis* NRRL Y-12968, *Lipomyces lipofer* NRRL Y-11555, *Yarrowia lipolytica* ACA DC  
171 50109 (culture collection of Agricultural University of Athens, Greece) and three newly  
172 isolated strains from Chilean Valdivian Forest namely *Meyerozyma guilliermondii* ACA-DC  
173 5397, *Scheffersomyces coipomoensis* ACA-DC 5395, *Sugiyamaella paludigena* ACA DC  
174 5396 (Valdés et al., 2020b). In addition, the fungal strain *Cunninghamella echinulata* CCF  
175 2195 (culture collection of fungi, Charles University, Prague, Czech Republic) was used in  
176 this research. All microbial strains were maintained at -80 °C in glycerol 30% and for short  
177 term maintenance on potato dextrose agar (PDA, Himedia, Mumbai, India) slants at  $4 \pm 1$  °C  
178 and regularly sub-cultured.

179

180 2.2 PR collection, media preparation and culture conditions

181 Fresh PRs (i.e. pomegranate peel and seeds remaining after juice extraction, cultivar  
182 *Wonderful*) were obtained from the Bacfresh Company located in Achaia regional unit of  
183 Greece, or produced in the laboratory after juice extraction using a mechanical home juicer.  
184 PR moisture was gravimetrically determined after drying at 105 °C in an oven until constant  
185 weight. Polysaccharide extraction and hydrolysis were simultaneously performed from wet  
186 PRs cut into pieces of  $0,5 \times 0,5$  cm in water or in H<sub>2</sub>SO<sub>4</sub> (Fluka, Steinheim, Germany)  
187 solution used at a ratio of 40 mL of water or H<sub>2</sub>SO<sub>4</sub> solution to 10 g of PRs. The treatment  
188 was performed using various concentrations of H<sub>2</sub>SO<sub>4</sub> (up to 0.10 M), at temperature 100 or  
189 120 °C, pressure 101 or 219 kPa and time ranging from 20 to 120 min. The treated PR  
190 mixture was subsequently centrifuged (Heraeus, Biofuge Stratus, Thermo Scientific,  
191 Osterode, Germany) at  $19,000 \times g$ , 4 °C for 10 min and the supernatant, optionally diluted  
192 with water, was used as culture medium. Supernatant pH was determined using an ORION  
193 pH meter (Boston, USA) and adjusted before inoculation to the desirable level (ranged from  
194 2.6 to  $6.5 \pm 0.1$ ) by adding 4 M NaOH (Merck) or 4 M HCL (Sigma-Aldrich).



195 Submerged cultures under near anaerobic conditions were conducted by yeast strains  
196 in manually periodically agitated 200 mL Duran flasks (Bioengineering, Wald, Switzerland)  
197 containing  $50 \pm 1$  mL of PR extract. The flasks were incubated in a Memmert GmbH+Co.  
198 KG, Germany incubator at temperature  $28 \text{ }^\circ\text{C}$ . Submerged cultures under aerobic conditions  
199 were performed in 250 mL Erlenmeyer flasks containing  $50 \pm 1$  mL of PR extract incubated  
200 in a rotary shaker (ZHICHENG ZHWY 211C, Shanghai, China) at agitation rate 180 rpm and  
201 temperature  $28 \text{ }^\circ\text{C}$ .

202 After medium sterilization (at  $121 \text{ }^\circ\text{C}$  for 20 min) the flasks were inoculated with 1  
203 mL of a pre-culture (containing  $10^8$  cells), carried out in a medium containing (in g/L): yeast  
204 extract (Conda) 3; glucose (AppliChem, Darmstadt, Germany) 10; peptone (Himedia) 5; malt  
205 extract 3 (Sigma-Aldrich, Steinheim, Germany), and incubated in a rotary shaker as above.

206 SSFs of wet chopped peels alone or in mixture with wheat bran (WB) or oat flakes  
207 (OFs) [used in different proportions to control moisture (Klempová et al., 2020)] were  
208 performed by *C. echinulata* in high-density polyethylene (HDPE) bags ( $20 \times 30$  cm)  
209 containing 10 g of substrate at room temperature ( $T = 25 \pm 2 \text{ }^\circ\text{C}$ ). HDPE bags ensure aseptic  
210 conditions and smooth oxygen transfer during fermentation. After sterilization (at  $105 \text{ }^\circ\text{C}$  for  
211 45 min) the bags were inoculated with  $10^7$  spores/mL obtained from a 7-day-old culture  
212 grown on polished rice (Slany et al., 2020). After inoculation the bags were closed and the  
213 substrate was arranged on the shelves to obtain a substrate layer thickness of around  $5 \text{ mm}$ .  
214 SSFs were carried out under static conditions for up to 5 days.

215

### 216 2.3 Microbial growth and biomass determination

217 Yeast growth was estimated by enumerating the number of cells/mL using a haemocytometer  
218 cell counting chamber (Neubauer improved, Poly-Oprik, Bad Blankenburg, Germany). Dry  
219 cell mass ( $x$ , g/L) was gravimetrically determined after harvesting of yeast cells by  
220 centrifugation at  $19,000 \times g$  for 15 min at  $4 \text{ }^\circ\text{C}$ . The cells were washed twice with NaCl 0.9%  
221 (w/v) and dried at  $80 \text{ }^\circ\text{C}$  until constant weight.

222 The fermented substrate after SSFs (around 10 g) was washed with 60 mL of distilled  
223 water and filtrated through Whatman No. 1 paper. The obtained byproduct was  
224 gravimetrically determined after drying at 60 °C until constant weight. The concentration of  
225 reducing sugars (R.S.) was determined in the filtrate (see below) and the fungal growth was  
226 indirectly estimated by calculating R.S. consumption. Besides, GLA concentration in lipids  
227 (estimated as described below) of the fermented substrate was additionally used as a marker  
228 to indirectly estimate fungal growth, as this FA is absent from the substrate.

229

#### 230 2.4 Sugar and phenolics determination

231 The concentration of total sugars (T.S.) and reducing sugars (R.S.) in the liquid growth  
232 medium and in the solid substrate extract was determined according to Dubois et al. (1951)  
233 and DNS (Miller, 1959) methods, respectively, and expressed as glucose equivalent (in g/L).  
234 Sugar concentrations were also expressed per weight of dry substrate. The total phenolic  
235 compounds in the liquid growth medium and in the solid substrate extract were determined  
236 according to Folin and Ciocalteu (1927). The concentration of phenolic compounds was  
237 expressed as gallic acid equivalent (in mg/L or per weight of dry substrate).

238

#### 239 2.5 Ethanol determination

240 Ethanol was determined in filtered aliquots of the culture supernatant by high performance  
241 liquid chromatographer (HPLC - Ultimate 3000 Dionex, Germering, Germany) equipped with  
242 a Reflective Index detector (RI-101, Shodex, Kawasaki, Kanagawa Japan) and an  
243 AminexHPX-87H column (300 × 7.8 mm). H<sub>2</sub>SO<sub>4</sub> (Fluka) 0.005 N was used as eluent at a  
244 flow rate of 0.6 mL/min. The column temperature was 65 °C.

245

#### 246 2.6 Lipid extraction and purification

247 Lipids from dry yeast cell mass or dry homogenized fermented substrate were extracted in  
248 chloroform:methanol (Sigma-Aldrich) (2:1 v/v) according to Folch et al. (1957) method as  
249 modified by Dourou et al. (2017). The extracts were filtered through Whatman No. 1 paper,

250 washed with a KCl (Sigma-Aldrich) 0.88% (w/v) solution and dried over anhydrous Na<sub>2</sub>SO<sub>4</sub>  
251 (Sigma-Aldrich). Finally, the solvents were evaporated under vacuum using a Rotavapor R-20  
252 device (BUCHI, Flawil, Switzerland), and the total lipids were gravimetrically determined.

253

#### 254 2.7 Fatty acid composition of microbial lipids

255 FA moieties of total lipids were converted into their FA methyl esters (FAMES) in a two-  
256 stage reaction according to AFNOR. FAMES were analyzed in a GC apparatus (Agilent 7890  
257 A, Agilent Technologies, Shanghai, China), equipped with a flame ionization detector (FID)  
258 and an HP-88 (J&W Scientific) column (60 m × 0.32 mm). Helium was used as carrier gas at  
259 a flow rate of 1 mL/min. Injection temperature was 250 °C, the oven temperature was 200 °C  
260 and FID temperature was 280 °C. Peaks of FAMES were identified by reference to authentic  
261 standards.

262

#### 263 2.8 Thin-layer chromatography (TLC) analysis

264 Known weight of total lipids (approximately 300 mg) were loaded in the form of narrow  
265 bands of 1 cm on Merck TLC silica gel 60 plates using a CAMAG ATS 4 apparatus and  
266 separated by a developing system for non-polar lipids using a solvent system consisting of  
267 hexane/diethyl ether/acetic acid (80:20:1, v/v/v). TLC plates were visualized using a  
268 combustion water solution containing 3.3% (v/v) sulfuric acid, 50% (v/v) methanol, 0.33%  
269 (w/v) MnCl<sub>2</sub>·4H<sub>2</sub>O, and dried at 130 °C for 10 min. After visualization, TLC plates were  
270 scanned by CAMAG TLC Scanner 4 at 400 nm and evaluated by winCATS software ver.  
271 1.4.8 (CAMAG) to evaluate lipidic structures such as TAGs, DAGs, FFAs, etc. in lipid  
272 extract (Gajdoš et al., 2015).

273

#### 274 2.9 Modelling

275 The Hinshelwood model (Hinshelwood, 1947) was used to describe yeast growth and ethanol  
276 production under aerobic and anaerobic conditions. The balance equations for cell mass and  
277 ethanol production and sugar consumption are:

$$\frac{dX}{dt} = \mu_{max} \left( \frac{S}{K_{sx} + S} \right) (1 - K_{px}P) X \quad (1)$$

$$\frac{dP}{dt} = q_{max} \left( \frac{S}{K_{sp} + S} \right) (1 - K_{pp}P) X \quad (2)$$

$$\frac{dS}{dt} = -\frac{1}{Y_{xS}} \frac{dX}{dt} - \frac{1}{Y_{pS}} \frac{dP}{dt} \quad (3)$$

278 where  $X$ ,  $S$  and  $P$  are cell mass, sugars and ethanol concentrations (g/L), respectively,  $t$  is the  
279 fermentation time (h),  $\mu_{max}$  is the maximum specific growth rate (1/h),  $q_{max}$  is the maximum  
280 specific ethanol production rate (1/h),  $K_{sx}$  and  $K_{sp}$  are the saturation constants (g/L),  $K_{px}$  and  
281  $K_{pp}$  are the ethanol inhibition constants (g/L),  $Y_{xS}$  is the yield coefficient for biomass  
282 production with respect to sugars (g biomass/g sugars) and  $Y_{pS}$  is the yield coefficient for  
283 ethanol production with respect to sugars (g ethanol/g sugars).

284 The fitting of the model equations on the experimental data, was performed using the  
285 numerical code Aquasim (Version 2.1d), which uses a fully implicit finite difference spatial  
286 discretization Gear scheme in conjunction with the algorithm DASSL. Aquasim uses the  
287 weighted least-squares method to estimate the optimum parameter values (Reichert, 1998).

288

## 289 2.10 Statistical analysis

290 The experimental data were treated using OriginPro 2018 Software (OriginLab Corporation,  
291 Northampton, MA, United States). One-way analysis of variance ANOVA followed by a  
292 Bonferroni post hoc test was performed to determine significant differences. The null  
293 hypothesis was rejected at a significance level of  $p \leq 0.01$  or  $0.05$ .

294

## 295 3. Results and Discussion

### 296 3.1 Pomegranate juice extraction and composition of the PRs

297 The composition of the PRs depends not only on the cultivation conditions and the cultivar  
298 but also on the efficiency of the extraction of the juice and the extraction technology used  
299 (Catania et al., 2020; Mphahlele et al., 2016). Thus, compositional differences concerning

300 mostly initial sugar and phenolic compounds concentration were observed among samples,  
301 which were used in the current investigation. The PRs resulting from the processing of the  
302 fruit under laboratory conditions constitute  $68.7 \pm 1.9\%$  of the total weight of the fruit, while  
303 this percentage can reach up to 80% under industrial processing conditions. Consequently, the  
304 yield in juice under laboratory conditions was  $29.3 \pm 1.3\%$ , while under industrial conditions  
305 it is estimated to be less than 20%. The presence of phenolics and flavonoids in the  
306 pomegranate juice is indeed suitable, due to the beneficial effects of these compounds on  
307 human health. However, exhaustive fruit juicing is not generally selected by the industry to  
308 avoid the exceeding enrichment of the juice in such compounds, which may affect the acidity  
309 and the color of pomegranate juice and, therefore, its quality (Catania et al., 2020; Türkyılmaz  
310 et al., 2013). The moisture of the solid residue produced under laboratory and industrial  
311 conditions was 66% and 75%, respectively.

312

### 313 3.2. Pretreatment of the PRs

314 PRs were cut into small pieces to reduce their size, increase the accessible area and improve  
315 the porosity. Following, PRs were treated for 20-120 min under acidic conditions with a  
316  $\text{H}_2\text{SO}_4$  solution up to 0.10 M, at high temperature (i.e. 100 and 120 °C) and pressure (i.e. 101  
317 and 213 kPa) for the simultaneous extraction and hydrolysis of the polysaccharides (Table 1).  
318 The efficiency of the extraction process was evaluated by calculating the percentage of T.S.  
319 extracted in the solution on the T.S. extracted under the strongest conditions (i.e. temperature  
320 121 °C, pressure 219 kPa,  $\text{H}_2\text{SO}_4$  0.10 M, for 60 min). Moreover, the efficiency of the  
321 hydrolysis process in each case was evaluated by calculating the percentage of R.S. on the  
322 T.S. in the extract.

323 Acid pretreatment is recommended for hardwoods and agricultural residues, while the  
324 kind of acid used (e.g. HCl,  $\text{H}_2\text{SO}_4$ ,  $\text{HNO}_3$  etc.), its concentration, temperature and reaction  
325 time differ in the various protocols described in the literature (Nitsos et al., 2018; Zhang and  
326 Bao, 2018). In the current investigation, we have demonstrated that the addition of a strong  
327 acid to PRs is not necessary to achieve adequate extraction of polysaccharides and their

328 hydrolysis to R.S., probably due to the high natural acidity of PRs imparting a  $\text{pH} \leq 3.5$ , and to  
329 the best physicochemical properties of water, as an extractant, against sulfuric acid solutions.  
330 Specifically, the extraction efficiency achieved in water at temperature 121 °C, under 219 kPa  
331 pressure, for 60 min was no statistically different (at  $p=0.01$  or  $0.05$ ) to that achieved under  
332 similar conditions in the presence of  $\text{H}_2\text{SO}_4$  used at concentrations 0.03-0.10 M (comparisons  
333 of entries c-g, Table 1). Similarly, the utilization of  $\text{H}_2\text{SO}_4$  did not significantly increase the  
334 hydrolysis efficiency (comparisons of entries c-g, Table 1). It is reported that the extraction  
335 efficiency of ingredients increases with fluidity and, in some cases, with solvent polarity (Xu  
336 et al., 2019). Low viscosity of the solvent is generally required to obtain high extraction  
337 yields since high viscosity hinders the mass transfer of the solvent to the target solutes. High  
338 polarity solvents are also required when polar molecules, such as polysaccharides, are  
339 targeted for extraction. Therefore, the higher polarity of water in combination with its low  
340 viscosity could explain the higher extraction yields obtained in this research in the absence of  
341 sulfuric acid. Çam and Hişil (2010) investigating polyphenols extraction from pomegranate  
342 peels, reported that water extraction was as effective as conventional methanol extraction.

343         The processing time is another factor that influences the extraction efficiency (Zhu  
344 and Liu, 2013). Comparing the effect of the processing time on polysaccharide extraction  
345 under the above-mentioned conditions (i.e. in water, at  $T=121$  °C,  $P=219$  kPa), we ascertain  
346 that the extraction yield at 20 min was higher compared to higher processing time (i.e. 30, 60,  
347 and 120 min, entries a-c and h in Table 1), although not statistically significant at  $p=0.01$  and  
348  $0.05$ . This apparent reduction in extraction yield is probably a result of sugar degradation.  
349 Therefore, the extraction time of 20 min was selected as a sufficient time for the extraction  
350 and hydrolysis of polysaccharides from PRs.

351         Trying to reduce the processing temperature more experiments were performed at 100  
352 °C and atmospheric pressure (i.e. 101 kPa) instead of 121 °C and 219 kPa. We note that the  
353 extraction efficiency was higher and the efficiency of hydrolysis lower at 100 °C than at 121  
354 °C (comparisons of entries h and i, Table 1). Zhu and Liu (2013) examining the effect of  
355 different temperatures (from 70 to 100 °C) on polysaccharide extraction, reported that

356 maximum yield was obtained at 95 - 100 °C. Finally, at T=100 °C comparing the effect of O<sub>2</sub>  
357 presence (entries i and j in Table 1), both T.S. and R.S. yields (in g/L) were higher (i.e. 5.3  
358 and 4.8% respectively) when a closed system, almost in the absence of O<sub>2</sub> was applied.

359 Generally, high temperature increases solubility and diffusion of the ingredients to be  
360 extracted and decreases the viscosity of the solvent, which is intended. Though, pressure  
361 seems to have a great influence on the extraction and hydrolysis yield too. Comparing the  
362 entries h-j in Table 1, it seems that conditions reported in entry i would be appropriate.  
363 However, the high processing time is not desirable, therefore, the conditions that we conclude  
364 to use for this research are those reported in entry a: in water, for 20 min, at T=121 °C and  
365 P=219 kPa.

366 The selection of the pretreatment method of lignocellulosic biomass and its operating  
367 conditions are fundamental for a successful polysaccharide extraction and hydrolysis, and the  
368 subsequent fermentation. Methods of chemical pretreatment such as acid, alkaline and their  
369 combination, are the most preferred techniques in recent years, thanks to their flexibility of  
370 applications at the industrial level, and the high final yields of assimilable sugars achieved  
371 (Valdés et al., 2020a). Among them, acid pretreatment, and specifically diluted acid  
372 pretreatment, is favorable. However, regardless of the pretreatment method used, toxic  
373 compounds are generated as by-products, such as formic, acetic and levulinic acid, neutral  
374 and acidic phenolics, and other chemicals in hydrolysates, which can inhibit microbial growth  
375 (Bravo et al., 2017; Haghghi Mood et al., 2013; Janga et al., 2012; Yu et al., 2018).

376

### 377 3.3 Microbial growth on PR based media

378 The growth of microorganisms on PRs presents various peculiarities related to the nature of  
379 the substrate, including assimilability of the contained carbon sources, the presence of  
380 microbial inhibitors (i.e. natural such as phenolic compounds or generated during pre-  
381 treatment), and its low pH values. Therefore, the challenge is to identify microbial strains  
382 capable of growing on PRs and PR extract. In the present study, the ability of the oleaginous  
383 fungus *C. echinulata* and the yeasts *C. tropicalis*, *L. lipofer*, *M. guilliermondii*, *S. cerevisiae*,

384 *S. coipomoensis*, *S. paludigena* and *Y. lipolytica* to grow on PRs or PR extract and produce  
385 various metabolites was studied under several growth conditions (Table 2). To the best of our  
386 knowledge, the current investigation is the first report in which both pomegranate peels and  
387 seeds have been employed as fermentation medium for microbial growth, while only recently,  
388 pomegranate peels have been treated as a substrate for biodiesel production by *Bacillus*  
389 *cereus* (Kanakdande et al., 2020) and for citric acid production by the fungus *Aspergillus*  
390 *niger* (Roukas and Kotzekidou, 2020).

391 A sustainable process for microbial conversion of lignocellulosic biomass into  
392 biofuels and other products is based on the capability of the microbial strains used to  
393 assimilate/co-assimilate, the various sugars (including C-5 and C-6) released during  
394 pretreatment (Valdés et al., 2020a). All microbial strains tested in the current investigation  
395 were able to grow on PRs or PR extract showing different biochemical potential and  
396 effectiveness (Table 2). Among them, the new isolates from the Chilean Valdivian forest  
397 identified as *M. guilliermondii*, *S. coipomensis*, and *S. paludigena* recently characterized for  
398 their ability to grow on lignocellulosic hydrolysate-model media (Valdés et al., 2020b),  
399 showed interesting ethanol production and lipid accumulation capacity, cultivated under  
400 anaerobic and aerobic conditions, respectively. The most commonly used yeast for ethanol  
401 production is *S. cerevisiae*. However this yeast is not able to metabolize pentose sugars  
402 naturally, such as xylose and arabinose, to ethanol, and therefore several strategies on  
403 engineering pentose metabolism on *S. cerevisiae* have been proposed (Fernandes and Murray,  
404 2010; Gopinarayanan and Nair, 2019; Hahn-Hägerdal et al., 2007). Interestingly, *S. cerevisiae*  
405 during submerged cultures on PR extract in this study showed remarkable growth and ethanol  
406 production ability. Contrary, growth and ethanol production by *C. tropicalis* was not  
407 satisfactory.

408 *L. lipofer* and *Y. lipolytica* were both able to accumulate lipids during submerged  
409 cultures on PRs extract. Strains belonging to the genus of *Lipomyces* have notable oleaginous  
410 capacity and are suitable for SCO production from lignocellulosic biomass and other agro-  
411 industrial wastes (Di Fidio et al., 2020; Dien et al., 2016; Dourou et al., 2016; Gong et al.,



412 2012; Liang and Jiang, 2013; Sitepu et al., 2013; Slininger et al., 2016; Vasaki et al., 2021;  
413 Zhao et al., 2008). *Y. lipolytica*, the most studied oleaginous yeast, is able to grow on a variety  
414 of agro-industrial substrates and to produce high added value metabolites (Carota et al., 2020;  
415 Chatzifragkou et al., 2011; da S. Pereira et al., 2019; Dobrowolski et al., 2016; Dourou et al.,  
416 2016; Makri et al., 2010; Patsios et al., 2020). Over the last decade, a variety of studies have  
417 focused on modifications of *Y. lipolytica* genome through genetic engineering to enable the  
418 efficient assimilation of sugars found in lignocellulosic biomass (Ledesma-Amaro and  
419 Nicaud, 2016; Niehus et al., 2018; Yook et al., 2020).

420         The oleaginous fungus *C. echinulata* was able to synthesize lipids during SSF on sole  
421 PRs or blends of PRs with WB or OFs (Table 2). WB and OFs are also produced in  
422 abundance, consisting yet again lignocellulosic residues which need management. In 2010,  
423 the National Green Tribunal established control measures to stop such biomass burning, due  
424 to air pollution, encouraging the exploitation of agricultural residues as a substrate for  
425 microbial production of high added-value products using environmentally friendly  
426 approaches. Filamentous fungi belonging to the *Cunninghamella* genus and related genera  
427 play an important role in developing sustainable biorefinery processes thanks to their ability  
428 to utilize a broad range of renewable feedstock, and waste materials (e.g. corn gluten, corn  
429 steep, orange peel and tomato waste hydrolysate) and convert them into SCOs containing  
430 significant quantities of GLA (Diwan and Gupta, 2019; Donot et al., 2014; Fakas et al., 2008;  
431 Gema et al., 2002).

432         Phenolic compounds present in agro-industrial residues are principally responsible for  
433 their phytotoxicity and microbial growth inhibition, while their breakdown is considered to be  
434 the limiting step during biotreatment (Aggelis et al., 2003; Tsioulpas et al., 2002). Moreover,  
435 phenolics can be released from lignin as by-products during the pretreatment of  
436 lignocellulosic biomass, depending on the parameters of the process, such as temperature and  
437 duration of the treatment. Phenolic compounds, when present in the growth media, penetrate  
438 biological membranes and cause loss of their integrity affecting cell growth and the whole  
439 fermentation process (Baral and Shah, 2014). Therefore, their degradation and/or removal

440 prior to the fermentation process is of high biotechnological interest. In this investigation, the  
441 PR extract used as a growth medium for submerged cultures of *L. lipofer* and *Y. lipolytica*  
442 was diluted in some cases with water to reduce the initial phenolic concentration and the  
443 results were compared to those obtained on undiluted PR hydrolysate (Table 2, see letters d,  
444 e, f). In addition, phenolic compounds were reduced in the case of SSF of *C. echinulata* by  
445 the incorporation of cereals. Nevertheless, remarkable phenolic removal (up to 30%) was  
446 performed in some cases by *C. echinulata*, *L. lipofer*, *M. guilliermondii*, *S. paludigena* and *Y.*  
447 *lipolytica*. Benzene compounds are degraded by a few stains belonging to the phylum  
448 Ascomycota (e.g. the yeasts *Debaryomyces hansenii*, *L. starkeyi*, and *S. cerevisiae*, the fungus  
449 *Geotrichum candidum*, and the yeast-like *Aureobasidium pullulans*) and the phylum  
450 Basidiomycota (*Rhodotorula*, *Trichosporon cutaneum*) (Pasha and Rao, 2009).

451 Low pH media are generally suitable for large scale applications since they are self-  
452 protected against bacterial contamination. Indeed, in media having exceptionally low pH,  
453 sterilization can be omitted, and the maintenance of aseptic conditions is not necessary. Thus,  
454 the fermentation cost can be significantly reduced. In the present study, the strains *M.*  
455 *guilliermondii*, *S. coipomoensis*, and *S. paludigena* were able to grow at pH = 2.6, *S.*  
456 *cerevisiae* at pH = 3.5 and 5.0, *C. tropicalis* at pH = 4.5, while *C. echinulata*, *L. lipofer* and *Y.*  
457 *lipolytica* were cultivated at their optimal pH value of 6.5.

458

### 459 3.4 Bioethanol production

460 Bioethanol produced using low- or negative- acquisition cost substrates, such as carbon-rich  
461 agro-industrial residues, is at the forefront of biotechnological/industrial interest for many  
462 years. Bioethanol can be used as a raw material in the food, pharmaceuticals and cosmetics  
463 industry or as biofuel. During alcoholic fermentation, the sugars in the form of hexoses or  
464 pentoses are transformed into pyruvic acid (through the metabolic path of glycolysis), which  
465 under anaerobic conditions, is converted into ethanol and CO<sub>2</sub>. The strain AXAZ-1 of *S.*  
466 *cerevisiae*, as well as *M. guilliermondii*, *S. coipomoensis*, and *S. paludigena* were used in the  
467 current investigation and proved able to grow well in PR extract and to efficiently convert

468 sugars to ethanol cultivated under anaerobic conditions (Fig. 1 and 2). The yeast *S. cerevisiae*  
469 is widely used worldwide in winemaking, in the brewery and baking industry, as well as in  
470 many other biotechnological applications, as it possesses key features, such as quick  
471 fermentation ability, genetic stability, tolerance to low pH environments, ethanol tolerance,  
472 osmotolerance and thermotolerance (Nevoigt, 2008; Sarris et al., 2014). PR extracts derived  
473 under laboratory and industrial processing conditions were used as a fermentation medium for  
474 *S. cerevisiae*. As mentioned above, the difference between these processes is that under  
475 industrial juicing the resulting extract had a higher sugar concentration. *M. guilliermondii*, is a  
476 promising species implicated in various biotechnological applications, including the  
477 conversion of pentoses to ethanol (Martini et al., 2016; Matos et al., 2014; Yan et al., 2021).  
478 Similarly, *Scheffersomyces* and *Sugiyamaella* genera are reported as xylose-fermenting  
479 genera containing species having an ethanol production capacity (Jia et al., 2020; Lopes et al.,  
480 2018; Morais et al., 2020; Sena et al., 2017). This is the first report that describes bioethanol  
481 production from *S. coipomoensis* and *S. paludigena* strains.

482         Several mathematical models have been developed to describe the alcoholic  
483 fermentation process (Birol et al., 1998). Among them, the Monod (Monod, 1942) and  
484 Hinshelwood (Hinshelwood, 1947) models have been considered as suitable to describe the  
485 process under low/very low product inhibition (Birol et al., 1998; Kostov et al., 2012). In the  
486 current paper, the Monod model was initially employed to describe microbial growth, ethanol  
487 production and sugars consumption during fermentation and to calculate parameter values.  
488 However, it was observed that this model was not able to simulate the process for most of the  
489 yeast strains, probably due to the inhibitory effect of ethanol on growth and ethanol  
490 production (data not shown). Alternatively, the Hinshelwood model, which includes  $K_{px}$  and  
491  $K_{pp}$  parameters indicating a weak inhibition on cell growth and ethanol production by ethanol  
492 (Kostov et al., 2012), was employed to simulate the process. Fig. 1 and 2 show experimental  
493 data and model fitting, while the estimated values of the kinetic parameters along with the  
494 correlation coefficient ( $R^2$ ) are shown in Table 3.

495 The  $\mu_{max}$  values ranged between 0.0038 and 0.0079 1/h, except for the value  
496 obtained from the yeast *S. coipomoensis* in anaerobic conditions, which was 0.00024 1/h. The  
497 corresponding values in the literature using the Hinshelwood model range from 0.231 to  
498 0.289 1/h by using free or immobilized cells of yeast *S. cerevisiae* growing on glucose  
499 (Kostov et al., 2012), sweet sorghum stalk juice (Jin et al., 2012) and corn stover (Tian and  
500 Chen, 2016). The low  $\mu_{max}$  values in the present study may be due to the cell growth  
501 inhibition by ethanol and/or inhibitory compounds generated during PRs pretreatment. It has  
502 been reported that the presence in the fermentation medium of phenolics at 2.0 g/L negatively  
503 affects both cell viability of *S. cerevisiae* and ethanol production (Liu et al., 2016). In the  
504 present study, the initial concentration of phenolic compounds was about 2.0 g/L and  
505 remained almost constant during fermentation of *S. cerevisiae*.  $Y_{ps}$  calculated under anaerobic  
506 conditions ranged from 0.389 (for *M. guilliermondii*) to 0.364 (for *S. paludigena*), while the  
507 experimental values are close to those predicted by the model (Table 3). For  $Y_{sx}$ , the values  
508 predicted by the model were in all cases higher compared to the experimental values for all  
509 yeast strains. These discrepancies may be due to the presence of growth inhibitors on PR  
510 extract that are not included in the Hinshelwood model. The estimated values of  $K_{pp}$ ,  $K_{px}$ ,  
511  $K_{sx}$  and  $K_{sp}$  are in the range of values reported in the literature (Birol et al., 1998; Jin et al.,  
512 2012; Kostov et al., 2012; Tian and Chen, 2016).

513 In all experiments, the mathematical model adequately predicts the biomass and  
514 ethanol production as well as sugar consumption, which was confirmed by the high  $R^2$  values  
515 in most of the cases. The kinetic parameters values vary among strains indicating that each of  
516 them exhibits a different growth behavior on PR extract under aerobic and anaerobic  
517 conditions (Table 3). Most yeast strains produced ethanol ranged between 3.6 and 12.5 g/L  
518 showing high productivities evidenced by the high values of the parameter  $q_{max}$  (ranged  
519 between 0.592 and 0.841 g/g·h). Exceptionally, *S. coipomoensis* cultivated under aerobic  
520 conditions did not produce significant ethanol quantities (up to 0.186 g/L at the end of  
521 fermentation), thus low  $q_{max}$  value was observed. Kostov et al. (2012) found that  $q_{max}$ ,

522 calculated using the Hinshelwood model fitted on the experimental data, of free cells of *S.*  
523 *cerevisiae* was 0.452 g/g h when cultivated on 110 g/L of glucose, while this value increased  
524 above 1 g/g h using immobilized cells of *S. cerevisiae*.

525 Worthy of mentioning is that all fermentations were conducted under low pH values.  
526 Specifically, *S. cerevisiae* was cultivated at pH=3.5 (natural pH of PR extract) and pH=5.0  
527 (after adjustment) on PR extract derived under laboratory processing conditions (Table 2),  
528 and ethanol and cell mass production was similar. Moreover, the pH during fermentation of  
529 *M. guilliermondii*, *S. paludigena* and *S. coipomoensis* was 2.6. The above-mentioned strains,  
530 having inherent tolerance of low pH, are suitable for industrial ethanol production.

531 Ethanol production by *S. cerevisiae* is reported using as substrate a variety of agro-  
532 industrial residues, such as enriched pasteurized grape musts, blends of molasses and olive  
533 mill wastewaters, olive mill wastewater enriched with glucose, sugarcane bagasse, dried fruits  
534 etc., reporting yields up to 0.5 g/g (Behera et al., 2011; Sarris et al., 2014, 2013, 2009; Singh  
535 et al., 2013). Other yeasts such as *C. shehatea*, *S. stipitis* and *Pachysolen tannophilus* have  
536 been reported as ethanol producers from xylose or cellobiose. Given the fact that *S. cerevisiae*  
537 cannot utilize xylose as part of its natural metabolism, the concurrent use of more than one  
538 microorganism, for instance, *S. stipitis* and *S. cerevisiae*, has gained popularity in the context  
539 of lignocellulose valorization (De Bari et al., 2013; Karagoz et al., 2019; Ntaikou et al., 2018;  
540 Santosh et al., 2017).

541

### 542 3.5 Single cell oil production

543 When undiluted PR extract was used as a culture medium for *L. lipofer*, lipid accumulation  
544 (L/x%, w/w) was 7.0%, probably restricted by the presence of phenolics or other inhibitors,  
545 while when the extract was diluted by 50%, L/x increased to 13.5% (Table 2). Dien et al.  
546 (2016) reported that the same strain of *L. lipofer* cultivated in sugar-rich media (i.e. 100 g/L)  
547 accumulated 61.6% lipids in the dry cell mass cultivated on glucose, 54.8% on xylose and  
548 56.9% on arabinose. Therefore the low lipid accumulation reported in the current paper  
549 should be attributed, in addition to the presence of phenolics, to the low sugar content in the

550 growth medium. On the other hand, yeast growth seems to be unaffected by the concentration  
551 of phenolics, as biomass production was proportional to the initial sugar concentration. The  
552 biotechnological potential of *M. guilliermondii*, *S. coipomoensis*, and *S. paludigena* to convert  
553 lignocellulosic sugars to oily biomass was first reported by Valdés et al. (2020b). In the  
554 present study, the above-mentioned strains, cultivated in undiluted PR extract presented an  
555 oleaginous capacity depending on the growth conditions (Table 2). Specifically, *M.*  
556 *guilliermondii* was able to produce 2.1 g/L dry cell mass and accumulate 18.1% lipids, while  
557 increased lipid accumulation was achieved by *S. paludigena* cultivated under aerobic  
558 conditions compared to anaerobic conditions (i.e. 15.4 and 9.0% respectively). Low lipid  
559 accumulation was achieved by *S. coipomoensis* under both aerobic and anaerobic conditions  
560 (i.e.  $L/x\%$  = 8.3 and 4.2%), although this yeast was able to accumulate almost 18% of lipids  
561 cultivated on glucose and xylose, and 24% on mannose (Valdés et al., 2020b). Although *Y.*  
562 *lipolytica* can grow on a variety of substrates and accumulate lipid in high percentages  
563 (Dourou et al., 2018; Papanikolaou and Aggelis, 2011a, 2011b, 2002), during submerged  
564 cultures on undiluted PR extract,  $X_{\max}$  did not exceed 1.7 g/L containing only 7.0% of lipids.  
565 However, when PR extract diluted by 50% lipid accumulation increased to 11.0% in the dry  
566 cell mass.

567 Oleic acid (C18:1) was the major FA in all lipids produced by the yeasts, followed by  
568 palmitic acid (C16:0) in the lipids of *M. guilliermondii*, *S. coipomoensis*, and *S. paludigena*  
569 (Table 4). In the lipids produced by *Y. lipolytica*, C16:0, palmitoleic (C16:1), and linoleic acid  
570 (C18:2) participated in non-negligible percentages. Stearic acid (C18:0) was detected in  
571 limited amounts in all lipids. According to these data, the oil produced seems to be suitable as  
572 raw material in the biodiesel industry. *Y. lipolytica* presented a similar FA profile to that  
573 previously reported when cultivated on olive mill wastewater or glycerol (Dourou et al., 2016;  
574 Makri et al., 2010; Papanikolaou and Aggelis, 2002). Contrary to the present study, Valdés et  
575 al. (2020b) reported that lipids of *M. guilliermondii* and *S. coipomensis* were rich in C16:1,  
576 and lipids of *S. paludigena* were rich in C18:2, suggesting that the nature of the carbon source  
577 affects the FA profile of these strains.

578           SSF, a fermentation technique suitable for low moisture solid substrates, is frequently  
579 used as an effective technology, alternative to submerged fermentation, for the valorization of  
580 various agro-industrial by-products (Čertík et al., 2012). PUFA-rich fermented substrates  
581 derived from SSFs, after the necessary processing, can be utilized in human diet or as a feed  
582 supplement (Čertík et al., 2013; Economou et al., 2010; Gema et al., 2002; Slaný et al., 2021).

583           Though the presence of R.S. in PRs was high (up to 160 mg/g of substrate, Fig. 3A),  
584 *C. echinulata* presented a low ability to grow on PRs used as sole substrate in SSF. This is  
585 probably the result of the presence of phenolic compounds in high amounts (i.e. up to 14.0  
586 mg/g substrate, Fig. 3B) or other inhibitors, the high substrate humidity (Fig. 3C) and/or the  
587 loss of nutrients during sterilization process. To reduce moisture to adequate levels, blends of  
588 PRs with two cereal substrates, WB and OFs, were used. These cereals, treated also as wastes,  
589 are a good source of carbon and other nutrients, supporting fungal proliferation (Čertík et al.,  
590 2013; Slaný et al., 2020). Actually, their incorporation in high percentage, positively affected  
591 fungal growth as R.S. consumption (Fig. 3A) and % substrate utilization (Fig. 3C) confirm.  
592 Specifically, when cereals were present at 70 to 90%, % substrate utilization was satisfactory.  
593 On the contrary, when PRs were present at a level higher than 30%, R.S. consumption and %  
594 substrate utilization were not satisfactory. During mixed cultures, R.S. originated from PRs (0  
595 day in Fig. 3A) were partly utilized by the fungus. Moreover, the addition of WB and OFs  
596 resulted in a reduction of water content (Fig. 3C), as well as, of phenolic compounds (up to  
597 3.5 mg/g substrate, Fig. 3B). In all cases, the percentage of substrate utilization and the level  
598 of GLA in intracellular lipid gradually increased and maximized on the 5<sup>th</sup> day (Fig. 3C and  
599 Fig. 4). *C. echinulata* cultivated on blends of 90% WB and 10% PRs, produced the highest  
600 GLA quantities (i.e. 4.8 mg GLA/g fermented substrate) corresponding to 13.6% GLA in total  
601 lipids, while increasing PRs incorporation resulted in decreased GLA production. The  
602 addition of 80% OFs resulted in the higher GLA production among OFs-blends (i.e. 3.1 mg  
603 GLA/g of fermented substrate representing 4.3% in total lipids). As in the case of WB, when  
604 PRs used in a higher percentage (up to 50%) *C. echinulata* formed a low amount of GLA (i.e.  
605 0.5-0.8 mg/g). When PRs were incorporated in low percentages GLA produced was higher

606 than that reported for *C. echinulata* ATHUM 4411 cultivated on orange peel, where GLA  
607 production was 1.2-1.5 mg/g fermented substrate (Gema et al., 2002).

608 The FA composition of lipids extracted from the fermented substrate was similar  
609 regardless of the starting substrate (PR or blends of PRs with WB or OFs) (Tables 5 and 6).  
610 C18:2 was the dominant FA and its concentration reduced with time. The percentage of C16:0  
611 in total lipids also decreased with time. On the contrary, the percentage of C18:1 increased  
612 with time, mostly in WB-blends, suggesting biosynthesis of this FA by *C. echinulata* and/or  
613 selective uptake of other FAs resulting in change of lipid profile. As expected GLA was not  
614 detected in the initial substrate and therefore was synthesized by the fungus during substrate  
615 assimilation. Some quantities of C18:2 were probably converted to GLA. In all cases, the  
616 final fermented substrate containing C18:2, GLA and C18:3n-3, even in small quantities, is of  
617 high nutritional value for animal or human consumption. The necessity for cereal-based  
618 products enriched with essential FAs and other compounds (such as pigments) has been  
619 reported (Čertík et al., 2013; Certik and Adamechova, 2009) and the use of oleaginous fungi  
620 during SSF seems like a promising approach.

621 TLC analysis of total lipids by *C. echinulata* is depicted in Fig. 5. The lipids of the  
622 fermented PRs contained various species of TAGs, while the absence of 1,3-DAG and  
623 ergosterol is noticed. Lipids from SSF performed on WB and OF alone contained ergosterol  
624 in significant percentages and TAGs were present in greater diversity. As the incorporation of  
625 PRs increased in the substrate, specific species of TAGs (i.e. TAG1) also increased, while on  
626 the contrary, the ergosterol content decreased. There are several distinct patterns of sterols  
627 among fungi, depending on the phylum and/or environmental conditions (Volkman, 2003).  
628 The presence of ergosterol in fungal or yeast lipids is essential for their response to stress by  
629 inhibitors and therefore to their growth (Dupont et al., 2012). Phytosterol content was similar  
630 in lipids produced during SSF on individual substrates (approximately 11%, w/w) and  
631 decreased in blends of PRs with cereals, with exception of the substrate in which OFs  
632 participated at a percentage of 80%, in which phytosterol remained in high levels. Moreover,  
633 the incorporation of WB resulted in a higher amount of free FAs on the final product, while



634 the percentage of polar lipids slightly increased in the case of blends of PRs with cereals  
635 (ranging from 6.2 to 11.5%). During SSF of WB by *Umbelopsis isabellina* the percentage of  
636 free FAs and sterols increased (Slaný et al., 2021).

637

#### 638 4. Conclusions

639 Agro-industrial residues, such as PRs, are suitable low-cost substrates for microbial  
640 fermentation processes leading to a “green” and cost-effective production of value-added  
641 products. These residues are largely available and abundant in nutrients. Researchers are  
642 focused on pretreatment methods of lignocellulosic biomass, while they have to overcome a  
643 variety of peculiarities to use such materials. In this investigation, efficient extraction and  
644 hydrolysis of the polysaccharides found in PRs were conducted in a one-step process and the  
645 resulted broth was successfully utilized by several yeast strains, able to grow into such  
646 extreme conditions, for either ethanol or SCOs production. Moreover, PRs combined with  
647 cereals, were effectively operated by an oleaginous fungus for the production of a final  
648 fermented substrate enriched with PUFAs. We conclude that new perspectives are emerging  
649 for the use of PRs as a raw material to produce valuable microbial metabolites, using  
650 environmentally friendly approaches.

651

#### 652 **Declaration of interests**

653 The authors declare that they have no known competing financial interests or personal  
654 relationships that could have appeared to influence the work reported in this paper.

655

#### 656 **Funding**

657 This work was financial supported by a) the project “INVALOR: Research Infrastructure for  
658 Waste Valorization and Sustainable Management” (MIS 5002495), which is implemented  
659 under the Action “Reinforcement of the Research and Innovation Infrastructure,” funded by  
660 the Operational Program “Competitiveness, Entrepreneurship and Innovation” (NSRF 2014–  
661 2020) and co-financed by Greece and the European Union (European Regional Development

662 Fund), b) the project “Optimization of pomegranate tree cultivation in Achaia and  
663 development of innovative products”, funded by the Regional Operational Program of  
664 Western Greece 2014-2020 and The Bacfresh Company and c) the grant VEGA 1/0323/19  
665 from Ministry of Education, Science, Research and Sports, Slovak Republic.

666 **Table 1:** Polysaccharide extraction and hydrolysis from PRs under various experimental  
667 conditions of H<sub>2</sub>SO<sub>4</sub> concentration, processing time and temperature. The asterisk (\*)  
668 indicates one set experiments performed using an open vessel assuring the presence of O<sub>2</sub>.  
669 Data are presented as mean values of three replications. Letters refer to comparisons at  
670 vertical reading only; different letters indicate that differences of means are statistically  
671 significant at  $p \leq 0.05$ . Data were treated by one-way ANOVA test followed by Bonferroni  
672 post hoc test.

673

| Set | Time (min) | Temperature (°C) | H <sub>2</sub> SO <sub>4</sub> (M) | Total Sugars (g/L)      | Reducing Sugars (g/L)   | Extraction (%) | Hydrolysis (%) |
|-----|------------|------------------|------------------------------------|-------------------------|-------------------------|----------------|----------------|
| a   | 20         | 121              | 0.00                               | 34.7 <sup>a</sup> ± 2.3 | 28.3 <sup>a</sup> ± 0.9 | 100.6          | 81.6           |
| b   | 30         | 121              | 0.00                               | 30.3 <sup>a</sup> ± 1.6 | 29.0 <sup>a</sup> ± 1.6 | 86.6           | 95.7           |
| c   | 60         | 121              | 0.00                               | 32.5 <sup>a</sup> ± 2.6 | 29.8 <sup>a</sup> ± 2.6 | 94.2           | 91.7           |
| d   | 60         | 121              | 0.03                               | 32.5 <sup>a</sup> ± 2.2 | 31.6 <sup>a</sup> ± 3.0 | 94.2           | 97.2           |
| e   | 60         | 121              | 0.05                               | 33.5 <sup>a</sup> ± 2.7 | 32.5 <sup>b</sup> ± 3.4 | 97.1           | 97.0           |
| f   | 60         | 121              | 0.07                               | 30.4 <sup>a</sup> ± 2.0 | 28.5 <sup>a</sup> ± 3.3 | 88.1           | 93.8           |
| g   | 60         | 121              | 0.10                               | 34.5 <sup>a</sup> ± 1.9 | 28.6 <sup>a</sup> ± 3.1 | 100.0          | 82.9           |
| h   | 120        | 121              | 0.00                               | 30.9 <sup>a</sup> ± 0.8 | 31.1 <sup>a</sup> ± 0.3 | 89.6           | 100.6          |
| i   | 120        | 100              | 0.00                               | 31.7 <sup>a</sup> ± 0.2 | 26.1 <sup>a</sup> ± 0.6 | 91.9           | 82.3           |
| j*  | 120        | 100              | 0.00                               | 30.1 <sup>a</sup> ± 0.5 | 24.9 <sup>b</sup> ± 0.2 | 87.2           | 82.7           |

674 **Table 2:** Cell mass, ethanol production, lipid accumulation and phenolic removal by different microorganisms cultivated on PR extract or solid residue under  
 675 different culture conditions. Abbreviations: R.S., reducing sugars; nd, not determined; ND, not detected

| Microbial strain         | Culture conditions |           |                      | Initial R.S. concentration (g/L or mg/g by-product) | X <sub>max</sub> (g/L) | Ethanol <sub>max</sub> (g/L) | L/X <sub>max</sub> % | Initial phenolic concentration (g/L or mg/g by-product) | Phenolic removal (% , w/w) |
|--------------------------|--------------------|-----------|----------------------|-----------------------------------------------------|------------------------|------------------------------|----------------------|---------------------------------------------------------|----------------------------|
|                          | Fermentation       | Growth    | pH                   |                                                     |                        |                              |                      |                                                         |                            |
| <i>C. echinulata</i>     | Solid state        | Aerobic   | 6.5                  | 163.7 <sup>a</sup>                                  | nd                     | -                            | 11.7                 | 14.0                                                    | 16.8                       |
|                          |                    |           | 6.5                  | 22.3 <sup>b</sup>                                   | nd                     | -                            | 4.8                  | 0.8                                                     | 44.3                       |
|                          |                    |           | 6.5                  | 7.5 <sup>c</sup>                                    | nd                     | -                            | 7.1                  | 2.5                                                     | 59.9                       |
| <i>C. tropicalis</i>     | Submerged          | Aerobic   | 4.5                  | 37.0 <sup>d, #</sup>                                | nd                     | 4.9                          | -                    | nd                                                      | nd                         |
|                          |                    | Anaerobic | 4.5                  | 32.1 <sup>d, *</sup>                                | nd                     | 6.8                          | -                    | nd                                                      | nd                         |
| <i>L. lipofer</i>        | Aerobic            | 6.5       | 22.5 <sup>d, #</sup> | 2.1                                                 | -                      | 7.0                          | 1.6                  | 29.8                                                    |                            |
|                          |                    | 6.5       | 15.3 <sup>e, #</sup> | 1.6                                                 | -                      | 3.9                          | 0.9                  | 18.3                                                    |                            |
|                          |                    | 6.5       | 9.6 <sup>f, #</sup>  | 1.0                                                 | -                      | 13.5                         | 0.5                  | 36.5                                                    |                            |
| <i>M. guilliermondii</i> | Aerobic            | 2.6       | 18.0 <sup>d, #</sup> | 2.1                                                 | 3.2                    | 18.1                         | 2.3                  | 48.8                                                    |                            |
|                          | Anaerobic          | 2.6       | 19.3 <sup>d, #</sup> | 1.7                                                 | 5.8                    | 4.7                          | 2.3                  | 22.3                                                    |                            |
| <i>S. cerevisiae</i>     | Anaerobic          | 3.5       | 30.8 <sup>d, #</sup> | 2.7                                                 | 7.4                    | -                            | 2.6                  | ND                                                      |                            |
|                          |                    | 3.5       | 37.4 <sup>d, *</sup> | 2.8                                                 | 12.5                   | -                            | nd                   | nd                                                      |                            |
|                          |                    | 3.5       | 32.3 <sup>d, *</sup> | 2.7                                                 | 9.3                    | -                            | nd                   | nd                                                      |                            |
|                          |                    | 5.0       | 33.3 <sup>d, #</sup> | 2.8                                                 | 9.7                    | -                            | 2.5                  | ND                                                      |                            |
| <i>S. coipomoensis</i>   | Aerobic            | 2.6       | 20.8 <sup>d, #</sup> | 0.7                                                 | 0.2                    | 8.3                          | 2.0                  | 22.7                                                    |                            |
|                          | Anaerobic          | 2.6       | 21.5 <sup>d, #</sup> | 1.0                                                 | 3.6                    | 4.2                          | 2.0                  | 30.6                                                    |                            |
| <i>S. paludigena</i>     | Aerobic            | 2.6       | 18.0 <sup>d, #</sup> | 2.1                                                 | 1.6                    | 15.4                         | 2.3                  | 61.0                                                    |                            |
|                          | Anaerobic          | 2.6       | 19.3 <sup>d, #</sup> | 1.5                                                 | 5.3                    | 9.0                          | 2.3                  | 22.1                                                    |                            |
| <i>Y. lipolytica</i>     | Aerobic            | 6.5       | 21.8 <sup>d, #</sup> | 1.7                                                 | -                      | 7.0                          | 2.6                  | 45.0                                                    |                            |
|                          |                    | 6.5       | 7.6 <sup>f, #</sup>  | 0.9                                                 | -                      | 11.0                         | 1.3                  | 64.5                                                    |                            |

676 <sup>a</sup>Fermentation on 100% PRs; <sup>b</sup>Fermentation on blend 10% PRs and 90% WB; <sup>c</sup>Fermentation on blend 20% PRs and 80% OFs; <sup>d</sup>100% PR extract; <sup>e</sup>80% PR  
 677 extract and 20% water; <sup>f</sup>50% PR extract and 50% water; <sup>#</sup>laboratory processing conditions; <sup>\*</sup> industrial processing conditions

678 **Table 3:** Kinetic parameter values of yeast strains growing under aerobic and anaerobic conditions in PRs extract. The asterisk (\*) indicates the experimental  
 679 values.

| Yeast strain             | Culture condition | Parameter                |                          |                          |                          |                           |                           |                          |                          |       |        | R <sup>2</sup> |
|--------------------------|-------------------|--------------------------|--------------------------|--------------------------|--------------------------|---------------------------|---------------------------|--------------------------|--------------------------|-------|--------|----------------|
|                          |                   | K <sub>pp</sub><br>(g/L) | K <sub>px</sub><br>(g/L) | K <sub>sp</sub><br>(g/L) | K <sub>sx</sub><br>(g/L) | q <sub>max</sub><br>(1/h) | μ <sub>max</sub><br>(1/h) | Y <sub>ps</sub><br>(g/g) | Y <sub>sx</sub><br>(g/g) |       |        |                |
| <i>M. guilliermondii</i> | Aerobic           | 0.762                    | 0.586                    | 1.478                    | 3.097                    | 0.841                     | 0.0074                    | 0.297                    | 0.240*                   | 0.199 | 0.149* | 0.679          |
|                          | Anaerobic         | 0.196                    | 0.209                    | 10.601                   | 1.864                    | 0.728                     | 0.0050                    | 0.389                    | 0.333*                   | 0.242 | 0.099* | 0.815          |
| <i>S. cerevisiae</i>     | Anaerobic         | 0.109                    | 0.095                    | 0.128                    | 2.122                    | 0.592                     | 0.0038                    | 0.373                    | 0.321*                   | 0.357 | 0.080* | 0.844          |
| <i>S. coipomoensis</i>   | Aerobic           | 10.055                   | 9.397                    | 13.750                   | 5.003                    | 0.101                     | 0.0079                    | 0.150                    | 0.022*                   | 0.096 | 0.072* | 0.579          |
|                          | Anaerobic         | 0.480                    | 0.437                    | 1.961                    | 0.039                    | 0.706                     | 0.00024                   | 0.369                    | 0.369*                   | 0.197 | 0.102* | 0.654          |
| <i>S. paludigena</i>     | Aerobic           | 0.741                    | 0.413                    | 0.165                    | 1.847                    | 0.734                     | 0.0042                    | 0.304                    | 0.120*                   | 0.208 | 0.152* | 0.636          |
|                          | Anaerobic         | 0.242                    | 0.249                    | 14.290                   | 4.641                    | 0.736                     | 0.0055                    | 0.364                    | 0.364*                   | 0.277 | 0.104* | 0.641          |

680

681 **Table 4:** Fatty acid composition (% , w/w) of total lipids produced by oleaginous yeasts  
682 cultivated on PRs. Data represent the mean of two determinations. Abbreviations: ND, not  
683 detected.

| Yeast strain             | Fatty acid composition (% , w/w) |               |              |               |               |               |
|--------------------------|----------------------------------|---------------|--------------|---------------|---------------|---------------|
|                          | C16:0                            | C16:1         | C18:0        | C18:1<br>n-9  | C18:2<br>n-6  | Others        |
| <i>M. guilliermondii</i> | 35.1<br>± 0.1                    | ND            | ND           | 61.9<br>± 0.9 | ND            | 3.0<br>± 0.2  |
| <i>S. coipomoensis</i>   | 35.5<br>± 0.3                    | ND            | ND           | 62.5<br>± 1.0 | ND            | 2.0<br>± 0.9  |
| <i>S. paludigena</i>     | 26.0<br>± 0.2                    | 11.6<br>± 0.3 | 3.9<br>± 0.0 | 37.5<br>± 0.5 | 4.5<br>± 0.0  | 16.7<br>± 1.1 |
| <i>Y. lipolytica</i>     | 12.7<br>± 0.1                    | 14.3<br>± 0.2 | 4.5<br>± 0.1 | 43.2<br>± 0.3 | 19.6<br>± 0.2 | 1.7<br>± 0.5  |

684

685 **Table 5:** Fatty acid composition (%) of total lipids of *Cunninghamella echinulata* during  
 686 solid-state fermentation on PRs and WB used in different ratios. Data represent the mean of  
 687 two determinations. Abbreviations: ND, not detected

| Ratio of PRs:WB (%) |     | Day of SSF | Fatty acid composition (%) |              |              |               |               |               |              |              |
|---------------------|-----|------------|----------------------------|--------------|--------------|---------------|---------------|---------------|--------------|--------------|
| PRs                 | WB  |            | C16:0                      | C16:1        | C18:0        | C18:1 n-9     | C18:2 n-6     | C18:3 n-6     | C18:3 n-3    | Others       |
| 0                   | 100 | 0          | 19.6<br>± 0.2              | ND           | 3.7<br>± 0.3 | 24.5<br>± 0.9 | 48.6<br>± 1.3 | ND            | 3.3<br>± 0.2 | 0.3<br>± 0.1 |
|                     |     | 5          | 14.6<br>± 0.1              | 0.6<br>± 0.0 | 2.9<br>± 0.1 | 26.4<br>± 1.1 | 39.8<br>± 1.1 | 14.4<br>± 0.4 | 1.1<br>± 0.0 | 0.2<br>± 0.0 |
|                     |     | 10         | 20.1<br>± 0.7              | 0.6<br>± 0.0 | 1.3<br>± 0.0 | 25.2<br>± 1.2 | 48.6<br>± 0.6 | ND            | 3.6<br>± 0.1 | 0.3<br>± 0.1 |
| 10                  | 90  | 0          | 15.7<br>± 0.3              | 0.9<br>± 0.1 | 4.4<br>± 0.5 | 29.7<br>± 0.7 | 40.5<br>± 0.7 | 5.0<br>± 0.1  | 3.3<br>± 0.2 | 0.5<br>± 0.2 |
|                     |     | 3          | 13.9<br>± 0.1              | 0.8<br>± 0.2 | 3.5<br>± 0.2 | 32.1<br>± 1.0 | 34.1<br>± 0.3 | 13.6<br>± 0.2 | 1.7<br>± 0.0 | 0.3<br>± 0.0 |
|                     |     | 5          | 19.9<br>± 0.5              | 0.2<br>± 0.0 | 2.2<br>± 0.0 | 26.0<br>± 0.9 | 48.5<br>± 1.2 | ND            | 3.0<br>± 0.2 | 0.2<br>± 0.0 |
| 20                  | 80  | 0          | 16.6<br>± 0.4              | 0.5<br>± 0.0 | 5.5<br>± 0.4 | 30.9<br>± 0.2 | 37.2<br>± 1.0 | 7.3<br>± 0.1  | 1.6<br>± 0.0 | 0.4<br>± 0.1 |
|                     |     | 3          | 16.5<br>± 0.5              | 0.8<br>± 0.1 | 5.9<br>± 0.6 | 33.9<br>± 0.7 | 33.3<br>± 0.4 | 8.1<br>± 0.2  | 1.1<br>± 0.1 | 0.4<br>± 0.1 |
|                     |     | 5          | 19.9<br>± 1.0              | 1.0<br>± 0.3 | 2.5<br>± 0.1 | 25.3<br>± 0.3 | 47.6<br>± 0.9 | ND            | 3.5<br>± 0.3 | 0.2<br>± 0.0 |
| 30                  | 70  | 0          | 18.0<br>± 0.2              | 0.4<br>± 0.0 | 4.3<br>± 0.1 | 26.5<br>± 0.5 | 44.2<br>± 0.7 | 3.6<br>± 0.0  | 2.7<br>± 0.2 | 0.3<br>± 0.0 |
|                     |     | 3          | 17.6<br>± 0.1              | 1.0<br>± 0.0 | 5.9<br>± 0.3 | 34.5<br>± 1.1 | 32.2<br>± 0.7 | 6.8<br>± 0.5  | 1.6<br>± 0.1 | 0.4<br>± 0.1 |
|                     |     | 5          | 21.2<br>± 1.1              | 0.5<br>± 0.1 | 3.0<br>± 0.2 | 23.8<br>± 0.6 | 48.2<br>± 0.2 | ND            | 3.1<br>± 0.2 | 0.2<br>± 0.0 |
| 40                  | 60  | 0          | 20.2<br>± 0.9              | 0.3<br>± 0.0 | 2.4<br>± 0.2 | 25.1<br>± 0.5 | 47.4<br>± 1.4 | 1.3<br>± 0.0  | 3.0<br>± 0.9 | 0.3<br>± 0.0 |
|                     |     | 3          | 17.3<br>± 0.3              | 0.4<br>± 0.0 | 4.3<br>± 0.7 | 30.3<br>± 1.0 | 40.3<br>± 1.1 | 4.6<br>± 0.2  | 2.5<br>± 0.7 | 0.3<br>± 0.1 |
|                     |     | 5          | 19.3<br>± 0.4              | 0.3<br>± 0.1 | 2.1<br>± 0.1 | 23.6<br>± 0.2 | 52.6<br>± 0.9 | ND            | 0.2<br>± 0.0 | 1.9<br>± 0.3 |
| 50                  | 50  | 0          | 16.2<br>± 0.1              | 0.2<br>± 0.0 | 3.2<br>± 0.0 | 23.3<br>± 0.5 | 51.7<br>± 0.6 | 5.0<br>± 0.1  | 0.2<br>± 0.0 | 0.2<br>± 0.0 |
|                     |     | 3          | 17.9<br>± 0.3              | 0.8<br>± 0.2 | 3.4<br>± 0.2 | 24.6<br>± 0.4 | 46.1<br>± 1.0 | 2.2<br>± 0.1  | 4.1<br>± 0.2 | 0.9<br>± 0.2 |
|                     |     | 5          |                            |              |              |               |               |               |              |              |

688

689 **Table 6:** Fatty acid composition (%) of total lipids of *Cunninghamella echinulata* during  
 690 solid-state fermentation on PRs and OFs used in different ratios. Data represent the mean of  
 691 two determinations.

| Ratio of PRs:OFs (%) |     | Day of SSF | Fatty acid composition (%) |              |              |               |               |              |              |              |
|----------------------|-----|------------|----------------------------|--------------|--------------|---------------|---------------|--------------|--------------|--------------|
| PRs                  | OFs |            | C16:0                      | C16:1        | C18:0        | C18:1 n-9     | C18:2 n-6     | C18:3 n-6    | C18:3 n-3    | Others       |
| 0                    | 100 | 1          | 15.7<br>± 1.1              | 0.9<br>± 0.1 | 1.3<br>± 0.2 | 38.9<br>± 1.1 | 41.3<br>± 0.2 | ND           | 1.5<br>± 0.1 | 0.4<br>± 0.1 |
|                      |     | 5          | 14.5<br>± 1.2              | 1.4<br>± 0.2 | 2.5<br>± 0.2 | 35.4<br>± 1.3 | 34.3<br>± 0.4 | 9.5<br>± 0.5 | 2.1<br>± 0.5 | 0.3<br>± 0.1 |
| 10                   | 90  | 0          | 16.9<br>± 0.9              | 0.3<br>± 0.0 | 1.5<br>± 0.1 | 37.7<br>± 0.7 | 41.5<br>± 1.0 | ND           | 1.9<br>± 0.2 | 0.2<br>± 0.0 |
|                      |     | 3          | 16.5<br>± 1.0              | 0.6<br>± 0.1 | 2.6<br>± 0.3 | 38.2<br>± 0.6 | 37.4<br>± 0.9 | 2.9<br>± 0.1 | 1.6<br>± 0.1 | 0.2<br>± 0.0 |
|                      |     | 5          | 14.8<br>± 0.5              | 1.2<br>± 0.1 | 4.4<br>± 0.5 | 29.4<br>± 0.3 | 39.9<br>± 0.4 | 5.8<br>± 0.3 | 4.3<br>± 0.6 | 0.2<br>± 0.0 |
| 20                   | 80  | 0          | 16.1<br>± 0.3              | 0.7<br>± 0.0 | 1.3<br>± 0.0 | 37.8<br>± 1.1 | 41.8<br>± 0.3 | ND           | 2.1<br>± 0.2 | 0.2<br>± 0.1 |
|                      |     | 3          | 15.5<br>± 0.8              | 0.5<br>± 0.0 | 2.3<br>± 0.2 | 37.0<br>± 1.2 | 38.6<br>± 0.8 | 3.8<br>± 0.2 | 2.0<br>± 0.3 | 0.3<br>± 0.0 |
|                      |     | 5          | 16.6<br>± 0.5              | 0.7<br>± 0.2 | 4.0<br>± 0.6 | 40.4<br>± 0.5 | 32.8<br>± 0.5 | 4.3<br>± 0.1 | 0.9<br>± 0.0 | 0.3<br>± 0.1 |
| 30                   | 70  | 0          | 17.2<br>± 0.2              | 0.6<br>± 0.1 | 1.9<br>± 0.4 | 38.1<br>± 0.2 | 39.6<br>± 0.6 | ND           | 2.4<br>± 0.2 | 0.2<br>± 0.0 |
|                      |     | 3          | 16.8<br>± 0.9              | 0.2<br>± 0.0 | 2.3<br>± 0.3 | 37.3<br>± 0.6 | 39.7<br>± 0.2 | 1.6<br>± 0.0 | 1.8<br>± 0.1 | 0.3<br>± 0.1 |
|                      |     | 5          | 16.4<br>± 1.1              | 0.4<br>± 0.0 | 2.1<br>± 0.1 | 38.2<br>± 0.7 | 40.0<br>± 1.0 | 1.1<br>± 0.1 | 1.6<br>± 0.1 | 0.2<br>± 0.0 |
| 40                   | 60  | 0          | 16.9<br>± 0.9              | 0.8<br>± 0.2 | 2.4<br>± 0.1 | 36.5<br>± 0.5 | 41.2<br>± 0.8 | ND           | 2.1<br>± 0.3 | 0.1<br>± 0.0 |
|                      |     | 3          | 17.2<br>± 0.5              | 0.7<br>± 0.0 | 3.0<br>± 0.6 | 39.7<br>± 1.1 | 35.7<br>± 0.3 | 1.9<br>± 0.1 | 1.5<br>± 0.3 | 0.3<br>± 0.0 |
|                      |     | 5          | 17.8<br>± 0.4              | 0.2<br>± 0.0 | 1.6<br>± 0.5 | 37.4<br>± 0.8 | 40.4<br>± 0.2 | 0.6<br>± 0.0 | 1.7<br>± 0.2 | 0.3<br>± 0.1 |
| 50                   | 50  | 0          | 19.7<br>± 1.1              | 0.5<br>± 0.1 | 5.0<br>± 0.9 | 37.7<br>± 0.2 | 34.4<br>± 0.4 | ND           | 1.9<br>± 0.2 | 0.8<br>± 0.2 |
|                      |     | 3          | 16.9<br>± 0.6              | 0.5<br>± 0.1 | 3.3<br>± 0.4 | 35.4<br>± 0.3 | 39.3<br>± 0.1 | 2.2<br>± 0.2 | 2.2<br>± 0.1 | 0.2<br>± 0.0 |
|                      |     | 5          | 19.0<br>± 0.8              | 0.6<br>± 0.2 | 3.8<br>± 0.2 | 36.9<br>± 0.4 | 38.1<br>± 0.1 | 1.4<br>± 0.1 | 0.1<br>± 0.0 | 0.1<br>± 0.0 |

692



693 **Figure captions**

694 **Fig. 1:** Kinetics of growth, ethanol production and substrate consumption of *Saccharomyces*  
695 *cerevisiae* under anaerobic conditions, cultivated at pH=3.5 and laboratory processing  
696 conditions (i), at pH=3.5 and industrial processing conditions (ii), (iii) and at pH=5.0 and  
697 laboratory processing conditions (iv). Points and lines represent experimental data and model  
698 prediction, respectively.

699

700 **Fig. 2:** Kinetics of growth, ethanol production and substrate consumption of *Meyerozyma*  
701 *guilliermondii* (A), *Scheffersomyces coipomoensis* (B), and *Sugiyamaella paludigena* (C)  
702 cultivated under anaerobic conditions at pH=2.6 and laboratory processing conditions. Points  
703 and lines represent experimental data and model prediction, respectively.

704

705 **Fig. 3:** Content of reducing (mg/g by-product) and total sugars (g/g by-product) (A), phenolic  
706 compounds (mg/g by-product) (B), and substrate humidity and utilization (%) (C) after solid-  
707 state fermentation using *Cunninghamella echinulata* on sole PRs (i), different amounts of PRs  
708 and WB (ii), and different amounts of PRs and OFs (iii).

709

710 **Fig. 4:** Content of total lipids (%), GLA on total lipids (%), yield of GLA (mg/g by-product)  
711 after solid-state fermentation using *Cunninghamella echinulata* on sole PRs (i), different  
712 amounts of PRs and WB (ii), and different amounts of PRs and OFs (iii).

713

714 **Fig. 5:** TLC analysis of non-polar lipids of *Cunninghamella echinulata*.

715 **References**

716 <https://www.worldbank.org/en/topic/agriculture/overview>

717 Aggelis, G., Iconomou, D., Christou, M., Bokas, D., Kotzailias, S., Christou, G., Tzagou, V.,

718 Papanikolaou, S., 2003. Phenolic removal in a model olive oil mill wastewater using

719 *Pleurotus ostreatus* in bioreactor cultures and biological evaluation of the process.

720 Water Res. 37, 3897–3904. [https://doi.org/10.1016/S0043-1354\(03\)00313-0](https://doi.org/10.1016/S0043-1354(03)00313-0)

721 Akhtar, S., Ismail, T., Fraternali, D., Sestili, P., 2015. Pomegranate peel and peel extracts:

722 Chemistry and food features. Food Chem. 174, 417-425.

723 <https://doi.org/10.1016/j.foodchem.2014.11.035>

724 Arevalo-Gallegos, A., Ahmad, Z., Asgher, M., Parra-Saldivar, R., Iqbal, H.M.N., 2017.

725 Lignocellulose: A sustainable material to produce value-added products with a zero

726 waste approach—A review. Int. J. Biol. Macromol. 99, 308–318.

727 <https://doi.org/10.1016/j.ijbiomac.2017.02.097>

728 Banković-Ilić, I.B., Stojković, I.J., Stamenković, O.S., Veljkovic, V.B., Hung, Y.T., 2014.

729 Waste animal fats as feedstocks for biodiesel production. Renew. Sustain. Energy Rev.

730 32, 238-254. <https://doi.org/10.1016/j.rser.2014.01.038>

731 Baral, N.R., Shah, A., 2014. Microbial inhibitors: formation and effects on acetone-butanol-

732 ethanol fermentation of lignocellulosic biomass. Appl. Microbiol. Biotechnol. 98, 9151–

733 9172. <https://doi.org/10.1007/s00253-014-6106-8>

734 Bassiri-Jahromi, S., 2018. *Punica granatum* (Pomegranate) activity in health promotion and

735 cancer prevention. Oncol. Rev. <https://doi.org/10.4081/oncol.2018.345>

736 Behera, S., Mohanty, R.C., Ray, R.C., 2011. Ethanol production from mahula (*Madhuca*

737 *latifolia* L.) flowers with immobilized cells of *Saccharomyces cerevisiae* in *Luffa*

738 *cylindrica* L. sponge discs. Appl. Energy. 88, 212-215.

739 <https://doi.org/10.1016/j.apenergy.2010.07.035>

740 Bellou, S., Triantaphyllidou, I.E., Aggeli, D., Elazzazy, A.M., Baeshen, M.N., Aggelis, G.,

741 2016. Microbial oils as food additives: Recent approaches for improving microbial oil

742 production and its polyunsaturated fatty acid content. Curr. Opin. Biotechnol. 37, 24–35.

- 743 <https://doi.org/10.1016/j.copbio.2015.09.005>
- 744 Birol, G., Doruker, P., Kirdar, B., Önsan, Z.I., Ülgen, K., 1998. Mathematical description of  
745 ethanol fermentation by immobilised *Saccharomyces cerevisiae*. *Process Biochem.* 33,  
746 763-771. [https://doi.org/10.1016/S0032-9592\(98\)00047-8](https://doi.org/10.1016/S0032-9592(98)00047-8)
- 747 Bravo, C., Garcés, D., Faba, L., Sastre, H., Ordóñez, S., 2017. Selective arabinose extraction  
748 from *Pinus* sp. sawdust by two-step soft acid hydrolysis. *Ind. Crops Prod.* 104, 229-236.  
749 <https://doi.org/10.1016/j.indcrop.2017.04.027>
- 750 Çam, M., Hişil, Y., 2010. Pressurised water extraction of polyphenols from pomegranate  
751 peels. *Food Chem.* 123, 878–885. <https://doi.org/10.1016/j.foodchem.2010.05.011>
- 752 Caporusso, A., De Bari, I., Valerio, V., Albergo, R., Liuzzi, F., 2021. Conversion of cardoon  
753 crop residues into single cell oils by *Lipomyces tetrasporus* and *Cutaneotrichosporon*  
754 *curvatus*: process optimizations to overcome the microbial inhibition of lignocellulosic  
755 hydrolysates. *Ind. Crops Prod.* 159, 113030.  
756 <https://doi.org/10.1016/j.indcrop.2020.113030>
- 757 Carota, E., Petruccioli, M., D'Annibale, A., Crognale, S., 2020. Mixed glycerol and orange  
758 peel-based substrate for fed-batch microbial biodiesel production. *Heliyon* 6, e04801.  
759 <https://doi.org/10.1016/j.heliyon.2020.e04801>
- 760 Catania, P., Comparetti, A., De Pasquale, C., Morello, G., Vallone, M., 2020. Effects of the  
761 extraction technology on pomegranate juice quality. *Agronomy* 10, 1483.  
762 <https://doi.org/10.3390/agronomy10101483>
- 763 Certik, M., Adamechova, Z., 2009. Cereal-based bioproducts containing polyunsaturated fatty  
764 acids. *Lipid Technol.* 21, 250-253. <https://doi.org/10.1002/lite.200900058>
- 765 Čertík, M., Adamechová, Z., Guothová, L., 2013. Simultaneous enrichment of cereals with  
766 polyunsaturated fatty acids and pigments by fungal solid state fermentations. *J.*  
767 *Biotechnol.* 168, 130–134. <https://doi.org/10.1016/j.jbiotec.2013.03.016>
- 768 Čertík, M., Adamechová, Z., Laoteng, K., 2012. Microbial production of  $\gamma$ -linolenic acid:  
769 Submerged versus solid-state fermentations. *Food Sci. Biotechnol.* 21, 921–926.  
770 <https://doi.org/10.1007/s10068-012-0121-2>

- 771 Chatzifragkou, A., Makri, A., Belka, A., Bellou, S., Mavrou, M., Mastoridou, M., Mystrioti,  
772 P., Onjaro, G., Aggelis, G., Papanikolaou, S., 2011. Biotechnological conversions of  
773 biodiesel derived waste glycerol by yeast and fungal species. *Energy* 36, 1097–1108.  
774 <https://doi.org/10.1016/j.energy.2010.11.040>
- 775 da S. Pereira, A., Fontes-Sant’Ana, G.C., Amaral, P.F.F., 2019. Mango agro-industrial wastes  
776 for lipase production from *Yarrowia lipolytica* and the potential of the fermented solid  
777 as a biocatalyst. *Food Bioprod. Process.* 115, 68–77.  
778 <https://doi.org/10.1016/j.fbp.2019.02.002>
- 779 da Silveira, F.A., de Oliveira Soares, D.L., Bang, K.W., Balbino, T.R., de Moura Ferreira,  
780 M.A., Diniz, R.H.S., de Lima, L.A., Brandão, M.M., Villas-Bôas, S.G., da Silveira,  
781 W.B., 2020. Assessment of ethanol tolerance of *Kluyveromyces marxianus* CCT 7735  
782 selected by adaptive laboratory evolution. *Appl. Microbiol. Biotechnol.* 104, 7483–  
783 7494. <https://doi.org/10.1007/s00253-020-10768-9>
- 784 Daskalaki, A., Perdikouli, N., Aggeli, D., Aggelis, G., 2019. Laboratory evolution strategies  
785 for improving lipid accumulation in *Yarrowia lipolytica*. *Appl. Microbiol. Biotechnol.*  
786 103, 8585–8596. <https://doi.org/10.1007/s00253-019-10088-7>
- 787 De Bari, I., De Canio, P., Cuna, D., Liuzzi, F., Capece, A., Romano, P., 2013. Bioethanol  
788 production from mixed sugars by *Scheffersomyces stipitis* free and immobilized cells,  
789 and co-cultures with *Saccharomyces cerevisiae*. *N. Biotechnol.* 30, 591-597.  
790 <https://doi.org/10.1016/j.nbt.2013.02.003>
- 791 De Melo, A.H.F., Lopes, A.M.M., Dezotti, N., Santos, I.L., Teixeira, G.S., Goldbeck, R.,  
792 2020. Evolutionary engineering of two robust Brazilian industrial yeast strains for  
793 thermotolerance and second-generation biofuels. *Ind. Biotechnol.* 16, 91-98.  
794 <https://doi.org/10.1089/ind.2019.0031>
- 795 Di Fidio, N., Dragoni, F., Antonetti, C., De Bari, I., Raspolli Galletti, A.M., Ragaglini, G.,  
796 2020. From paper mill waste to single cell oil: Enzymatic hydrolysis to sugars and their  
797 fermentation into microbial oil by the yeast *Lipomyces starkeyi*. *Bioresour. Technol.*  
798 315, 123790. <https://doi.org/10.1016/j.biortech.2020.123790>

- 799 Dien, B.S., Slininger, P.J., Kurtzman, C.P., Moser, B.R., O'Bryan, P.J., 2016. Identification  
800 of superior lipid producing *Lipomyces* and *Myxozyma* yeasts. AIMS Environ. Sci. 3, 1–  
801 20. <https://doi.org/10.3934/environsci.2016.1.1>
- 802 Diwan, B., Gupta, P., 2020. Conversion of rice straw to caprylic acid-rich microbial oils by  
803 oleaginous yeast isolates. Biomass Convers. Biorefinery.  
804 <https://doi.org/10.1007/s13399-020-01039-8>
- 805 Diwan, B., Gupta, P., 2019. Lignocellulosic biomass to fungal oils: A radical bioconversion  
806 toward establishing a prospective resource, in: Yadav, A., Singh, S., Mishra, S., Gupta,  
807 A. (Eds.), Recent advancement in white biotechnology through fungi. Springer, pp.  
808 407–440. [https://doi.org/10.1007/978-3-030-14846-1\\_14](https://doi.org/10.1007/978-3-030-14846-1_14)
- 809 Dobrowolski, A., Mituła, P., Rymowicz, W., Mirończuk, A.M., 2016. Efficient conversion of  
810 crude glycerol from various industrial wastes into single cell oil by yeast *Yarrowia*  
811 *lipolytica*. Bioresour. Technol. 207, 237-243.  
812 <https://doi.org/10.1016/j.biortech.2016.02.039>
- 813 Donot, F., Fontana, A., Baccou, J.C., Strub, C., Schorr-Galindo, S., 2014. Single cell oils  
814 (SCOs) from oleaginous yeasts and moulds: Production and genetics. Biomass and  
815 Bioenergy 68, 135–150. <https://doi.org/10.1016/j.biombioe.2014.06.016>
- 816 Dourou, M., Aggeli, D., Papanikolaou, S., Aggelis, G., 2018. Critical steps in carbon  
817 metabolism affecting lipid accumulation and their regulation in oleaginous  
818 microorganisms. Appl. Microbiol. Biotechnol. 102, 2509–2523.  
819 <https://doi.org/10.1007/s00253-018-8813-z>
- 820 Dourou, M., Kancelista, A., Juszczak, P., Sarris, D., Bellou, S., Triantaphyllidou, I.E.,  
821 Rywinska, A., Papanikolaou, S., Aggelis, G., 2016. Bioconversion of olive mill  
822 wastewater into high-added value products. J. Clean. Prod. 139, 957–969.  
823 <https://doi.org/10.1016/j.jclepro.2016.08.133>
- 824 Dourou, M., Mizerakis, P., Papanikolaou, S., Aggelis, G., 2017. Storage lipid and  
825 polysaccharide metabolism in *Yarrowia lipolytica* and *Umbelopsis isabellina*. Appl.  
826 Microbiol. Biotechnol. 101, 7213–7226. <https://doi.org/10.1007/s00253-017-8455-6>

- 827 Dubois, M., Gilles, K., Hamilton, J.K., Rebers, P.A., Smith, F., 1951. A colorimetric method  
828 for the determination of sugars. *Nature* 168, 167. <https://doi.org/10.1038/168167a0>
- 829 Dupont, S., Lemetais, G., Ferreira, T., Cayot, P., Gervais, P., Beney, L., 2012. Ergosterol  
830 biosynthesis: A fungal pathway for life on land? *Evolution*. 66, 2961-2968.  
831 <https://doi.org/10.1111/j.1558-5646.2012.01667.x>
- 832 Economou, C.N., Makri, A., Aggelis, G., Pavlou, S., Vayenas, D. V., 2010. Semi-solid state  
833 fermentation of sweet sorghum for the biotechnological production of single cell oil.  
834 *Bioresour. Technol.* 101, 1385–1388. <https://doi.org/10.1016/j.biortech.2009.09.028>
- 835 Fakas, S., Čertík, M., Papanikolaou, S., Aggelis, G., Komaitis, M., Galiotou-Panayotou, M.,  
836 2008.  $\gamma$ -Linolenic acid production by *Cunninghamella echinulata* growing on complex  
837 organic nitrogen sources. *Bioresour. Technol.* 99, 5986–5990.  
838 <https://doi.org/10.1016/j.biortech.2007.10.016>
- 839 Fakas, S., Makri, A., Mavromati, M., Tselepi, M., Aggelis, G., 2009. Fatty acid composition  
840 in lipid fractions lengthwise the mycelium of *Mortierella isabellina* and lipid production  
841 by solid state fermentation. *Bioresour. Technol.* 100, 6118–6120.  
842 <https://doi.org/10.1016/j.biortech.2009.06.015>
- 843 Fernandes, S., Murray, P.G., 2010. Metabolic engineering for improved microbial pentose  
844 fermentation. *Bioeng. Bugs* 1, 424–428. <https://doi.org/10.4161/bbug.1.6.12724>
- 845 Folch, J., Lees, M., Stanley, G.H.S., 1957. A simple method for the isolation and purification  
846 of total lipides from animal tissues. *J. Biol. Chem.* 226, 497–509.
- 847 Folin, O., Ciocalteau, V., 1927. Tyrosine and tryptophane in proteins. *J. Biol. Chem.* 73, 627–  
848 648.
- 849 Gajdoš, P., Nicaud, J.M., Rossignol, T., Čertík, M., 2015. Single cell oil production on  
850 molasses by *Yarrowia lipolytica* strains overexpressing *DGA2* in multicopy. *Appl.*  
851 *Microbiol. Biotechnol.* 99, 8065-8074. <https://doi.org/10.1007/s00253-015-6733-8>.
- 852 Gema, H., Kavadia, A., Dimou, D., Tsagou, V., Komaitis, M., Aggelis, G., 2002. Production  
853 of  $\gamma$ -linolenic acid by *Cunninghamella echinulata* cultivated on glucose and orange peel.  
854 *Appl. Microbiol. Biotechnol.* 58, 303–307. <https://doi.org/10.1007/s00253-001-0910-7>

- 855 Ghinea, C., Apostol, L.C., Prisacaru, A.E., Leahu, A., 2019. Development of a model for food  
856 waste composting. *Environ. Sci. Pollut. Res.* 26, 4056–4069.  
857 <https://doi.org/10.1007/s11356-018-3939-1>
- 858 Gong, Z., Wang, Q., Shen, H., Hu, C., Jin, G., Zhao, Z.K., 2012. Co-fermentation of  
859 cellobiose and xylose by *Lipomyces starkeyi* for lipid production. *Bioresour. Technol.*  
860 117, 20–24. <https://doi.org/10.1016/j.biortech.2012.04.063>
- 861 Gopinarayanan, V.E., Nair, N.U., 2019. Pentose metabolism in *Saccharomyces cerevisiae*:  
862 The need to engineer global regulatory systems. *Biotechnol. J.* 14, 1800364.  
863 <https://doi.org/10.1002/biot.201800364>
- 864 Goula, A.M., Ververi, M., Adamopoulou, A., Kaderides, K., 2017. Green ultrasound-assisted  
865 extraction of carotenoids from pomegranate wastes using vegetable oils. *Ultrason.*  
866 *Sonochem.* 34, 821-830. <https://doi.org/10.1016/j.ultsonch.2016.07.022>
- 867 Gray, K.A., Zhao, L., Emptage, M., 2006. *Bioethanol. Curr. Opin. Chem. Biol.* 10, 141–146.  
868 <https://doi.org/10.1016/j.cbpa.2006.02.035>
- 869 Gutiérrez, C.D.B., Serna, D.L.R., Alzate, C.A.C., 2017. A comprehensive review on the  
870 implementation of the biorefinery concept in biodiesel production plants. *Biofuel Res. J.*  
871 4, 691-703. <https://doi.org/10.18331/BRJ2017.4.3.6>
- 872 Haghghi Mood, S., Hossein Golfeshan, A., Tabatabaei, M., Salehi Jouzani, G., Najafi, G.H.,  
873 Gholami, M., Ardjmand, M., 2013. Lignocellulosic biomass to bioethanol, a  
874 comprehensive review with a focus on pretreatment. *Renew. Sustain. Energy Rev.* 27,  
875 77–93. <https://doi.org/10.1016/j.rser.2013.06.033>
- 876 Hahn-Hägerdal, B., Karhumaa, K., Fonseca, C., Spencer-Martins, I., Gorwa-Grauslund, M.F.,  
877 2007. Towards industrial pentose-fermenting yeast strains. *Appl. Microbiol. Biotechnol.*  
878 74, 937–953. <https://doi.org/10.1007/s00253-006-0827-2>
- 879 Hasnaoui, N., Wathelet, B., Jiménez-Araujo, A., 2014. Valorization of pomegranate peel from  
880 12 cultivars: Dietary fibre composition, antioxidant capacity and functional properties.  
881 *Food Chem.* 160, 196–203. <https://doi.org/10.1016/j.foodchem.2014.03.089>
- 882 Hinshelwood, C.N., 1947. The chemical kinetics of the bacterial cell. *J. Am. Chem. Soc.*

- 883 <https://doi.org/10.1021/ja01201a035>
- 884 Janga, K.K., Hägg, M.B., Moe, S.T., 2012. Influence of acid concentration, temperature, and  
885 time on decrystallization in two-stage concentrated sulfuric acid hydrolysis of pinewood  
886 and aspenwood: A statistical approach. *BioResources*. 7, 391-411.  
887 <http://ncsu.edu/bioresources> ISSN: 1930-2126
- 888 Jia, R., Lv, S., Chai, C., Hui, F., 2020. Three new *Scheffersomyces* species associated with  
889 insects and rotting wood in China. *MycKeys* 71, 87–99.  
890 <https://doi.org/10.3897/mycokeys.71.56168>
- 891 Jin, H., Liu, R., He, Y., 2012. Kinetics of batch fermentations for ethanol production with  
892 immobilized *Saccharomyces cerevisiae* growing on sweet sorghum stalk juice. *Procedia*  
893 *Environ. Sci.* 12, 137-145. <https://doi.org/10.1016/j.proenv.2012.01.258>
- 894 Joseph, M.M., Aravind, S.R., George, S.K., Varghese, S., Sreelekha, T.T., 2013. A  
895 galactomannan polysaccharide from *Punica granatum* imparts in vitro and in vivo  
896 anticancer activity. *Carbohydr. Polym.* 98, 1466-1475.  
897 <https://doi.org/10.1016/j.carbpol.2013.07.023>
- 898 Kaderides, K., Goula, A.M., Adamopoulos, K.G., 2015. A process for turning pomegranate  
899 peels into a valuable food ingredient using ultrasound-assisted extraction and  
900 encapsulation. *Innov. Food Sci. Emerg. Technol.* 31, 204–215.  
901 <https://doi.org/10.1016/j.ifset.2015.08.006>
- 902 Kanakdande, A.P., Khobragade, C.N., Mane, R.S., 2020. Utilization of pomegranate waste-  
903 peel as a novel substrate for biodiesel production by: *Bacillus cereus* (MF908505).  
904 *Sustain. Energy Fuels* 4, 1199–1207. <https://doi.org/10.1039/c9se00584f>
- 905 Karagoz, P., Bill, R.M., Ozkan, M., 2019. Lignocellulosic ethanol production: Evaluation of  
906 new approaches, cell immobilization and reactor configurations. *Renew. Energy.* 143,  
907 741-752. <https://doi.org/10.1016/j.renene.2019.05.045>
- 908 Klemková, T., Slaný, O., Šišmiš, M., Marcinčák, S., Čertík, M., 2020. Dual production of  
909 polyunsaturated fatty acids and beta-carotene with *Mucor wosnessenskii* by the process  
910 of solid-state fermentation using agro-industrial waste. *J. Biotechnol.* 311, 1–11.



- 911 <https://doi.org/10.1016/j.jbiotec.2020.02.006>
- 912 Kostov, G., Popova, S., Gochev, V., Koprinkova-Hristova, P., Angelov, M., Georgieva, A.,  
913 2012. Modeling of batch alcohol fermentation with free and immobilized yeasts  
914 *Saccharomyces cerevisiae* 46 EVD. *Biotechnol. Biotechnol. Equip.* 26, 3021-3030.  
915 <https://doi.org/10.5504/bbeq.2012.0025>
- 916 Ledesma-Amaro, R., Nicaud, J.-M., 2016. Metabolic engineering for expanding the substrate  
917 range of *Yarrowia lipolytica*. *Trends Biotechnol.* 34, 798–809.  
918 <https://doi.org/10.1016/j.tibtech.2016.04.010>
- 919 Li, Q., Du, W., Liu, D., 2008. Perspectives of microbial oils for biodiesel production. *Appl.*  
920 *Microbiol. Biotechnol.* 80, 749–756. <https://doi.org/10.1007/s00253-008-1625-9>
- 921 Li, W.C., Zhu, J.Q., Zhao, X., Qin, L., Xu, T., Zhou, X., Li, X., Li, B.Z., Yuan, Y.J., 2019.  
922 Improving co-fermentation of glucose and xylose by adaptive evolution of engineering  
923 xylose-fermenting *Saccharomyces cerevisiae* and different fermentation strategies.  
924 *Renew. Energy.* 139, 1176-1183. <https://doi.org/10.1016/j.renene.2019.03.028>
- 925 Liang, M.H., Jiang, J.G., 2013. Advancing oleaginous microorganisms to produce lipid via  
926 metabolic engineering technology. *Prog. Lipid Res.* 52, 395–408.  
927 <https://doi.org/10.1016/j.plipres.2013.05.002>
- 928 Liu, X., Xu, W., Mao, L., Zhang, C., Yan, P., Xu, Z., Zhang, Z.C., 2016. Lignocellulosic  
929 ethanol production by starch-base industrial yeast under PEG detoxification. *Sci. Rep.* 6,  
930 20361. <https://doi.org/10.1038/srep20361>
- 931 Lopes, M.R., Batista, T.M., Franco, G.R., Ribeiro, L.R., Santos, A.R.O., Furtado, C., Moreira,  
932 R.G., Goes-Neto, A., Vital, M.J.S., Rosa, L.H., Lachance, M.-A., Rosa, C.A., 2018.  
933 *Scheffersomyces stambukii* f.a., sp. nov., a d-xylose-fermenting species isolated from  
934 rotting wood. *Int. J. Syst. Evol. Microbiol.* 68, 2306–2312.  
935 <https://doi.org/10.1099/ijsem.0.002834>
- 936 Makri, A., Fakas, S., Aggelis, G., 2010. Metabolic activities of biotechnological interest in  
937 *Yarrowia lipolytica* grown on glycerol in repeated batch cultures. *Bioresour. Technol.*  
938 101, 2351–2358. <https://doi.org/10.1016/j.biortech.2009.11.024>

- 939 Martini, C., Tauk-Tornisielo, S.M., Codato, C.B., Bastos, R.G., Ceccato-Antonini, S.R., 2016.  
940 A strain of *Meyerozyma guilliermondii* isolated from sugarcane juice is able to grow and  
941 ferment pentoses in synthetic and bagasse hydrolysate media. World J. Microbiol.  
942 Biotechnol. 32, 80. <https://doi.org/10.1007/s11274-016-2036-1>
- 943 Matos, I.T.S.R., Cassa-Barbosa, L.A., Galvão, R. de S.M., Nunes-Silva, C.G., Filho, S.A.,  
944 2014. Isolation, taxonomic identification and investigation of the biotechnological  
945 potential of wild-type *Meyerozyma guilliermondii* associated with Amazonian termites  
946 able to ferment D-xylose. Biosci. J. 30, 260-266.
- 947 Miller, G.L., 1959. Use of dinitrosalicylic acid reagent for determination of reducing sugar.  
948 Anal. Chem. 31, 426–428. <https://doi.org/10.1021/ac60147a030>
- 949 Monod, J., 1942. Recherches sur la croissance des cultures bacteriennes. Ann. Inst. Pasteur.
- 950 Morais, C.G., Sena, L.M.F., Lopes, M.R., Santos, A.R.O., Barros, K.O., Alves, C.R.,  
951 Uetanabaro, A.P.T., Lachance, M.A., Rosa, C.A., 2020. Production of ethanol and  
952 xylanolytic enzymes by yeasts inhabiting rotting wood isolated in sugarcane bagasse  
953 hydrolysate. Fungal Biol. 124, 639–647. <https://doi.org/10.1016/j.funbio.2020.03.005>
- 954 Mosier, N., 2005. Features of promising technologies for pretreatment of lignocellulosic  
955 biomass. Bioresour. Technol. 96, 673–686.  
956 <https://doi.org/10.1016/j.biortech.2004.06.025>
- 957 Mphahlele, R.R., Fawole, O.A., Mokwena, L.M., Opara, U.L., 2016. Effect of extraction  
958 method on chemical, volatile composition and antioxidant properties of pomegranate  
959 juice. South African J. Bot. 103, 135–144. <https://doi.org/10.1016/j.sajb.2015.09.015>
- 960 Nevoigt, E., 2008. Progress in metabolic engineering of *Saccharomyces cerevisiae*.  
961 Microbiol. Mol. Biol. Rev. 72, 379–412. <https://doi.org/10.1128/MMBR.00025-07>
- 962 Niehus, X., Crutz-Le Coq, A.-M., Sandoval, G., Nicaud, J.-M., Ledesma-Amaro, R., 2018.  
963 Engineering *Yarrowia lipolytica* to enhance lipid production from lignocellulosic  
964 materials. Biotechnol. Biofuels 11, 11. <https://doi.org/10.1186/s13068-018-1010-6>
- 965 Nitsos, C., Matsakas, L., Triantafyllidis, K., Rova, U., Christakopoulos, P., 2018.  
966 Investigation of different pretreatment methods of Mediterranean-type ecosystem

- 967 agricultural residues: characterisation of pretreatment products, high-solids enzymatic  
968 hydrolysis and bioethanol production. *Biofuels* 9, 545–558.  
969 <https://doi.org/10.1080/17597269.2017.1378988>
- 970 Ntaikou, I., Menis, N., Alexandropoulou, M., Antonopoulou, G., Lyberatos, G., 2018.  
971 Valorization of kitchen biowaste for ethanol production via simultaneous  
972 saccharification and fermentation using co-cultures of the yeasts *Saccharomyces*  
973 *cerevisiae* and *Pichia stipitis*. *Bioresour. Technol.* 263, 75-83.  
974 <https://doi.org/10.1016/j.biortech.2018.04.109>
- 975 Osorio-González, C.S., Hegde, K., Brar, S.K., Kermanshahpour, A., Avalos-Ramírez, A.,  
976 2019. Challenges in lipid production from lignocellulosic biomass using  
977 *Rhodospiridium* sp.; A look at the role of lignocellulosic inhibitors. *Biofuels, Bioprod.*  
978 *Biorefining.* 13, 740-759. <https://doi.org/10.1002/bbb.1954>
- 979 Papanikolaou, S., Aggelis, G., 2011a. Lipids of oleaginous yeasts. Part I: Biochemistry of  
980 single cell oil production. *Eur. J. Lipid Sci. Technol.* 113, 1031–1051.  
981 <https://doi.org/10.1002/ejlt.201100014>
- 982 Papanikolaou, S., Aggelis, G., 2011b. Lipids of oleaginous yeasts. Part II: Technology and  
983 potential applications. *Eur. J. Lipid Sci. Technol.* 113, 1052–1073.  
984 <https://doi.org/10.1002/ejlt.201100015>
- 985 Papanikolaou, S., Aggelis, G., 2002. Lipid production by *Yarrowia lipolytica* growing on  
986 industrial glycerol in a single-stage continuous culture. *Bioresour. Technol.* 82, 43–49.  
987 [https://doi.org/10.1016/S0960-8524\(01\)00149-3](https://doi.org/10.1016/S0960-8524(01)00149-3)
- 988 Pasha, C., Rao, L.V., 2009. *Yeast biotechnology: Diversity and applications*. Springer  
989 Netherlands, Dordrecht. pp. 551-588. <https://doi.org/10.1007/978-1-4020-8292-4>
- 990 Pathak, P.D., Mandavgane, S.A., Kulkarni, B.D., 2017. Valorization of pomegranate peels: A  
991 biorefinery approach. *Waste and biomass valorization.* 8, 1127-1137.  
992 <https://doi.org/10.1007/s12649-016-9668-0>
- 993 Patsios, S.I., Dedousi, A., Sossidou, E.N., Zdragas, A., 2020. Sustainable animal feed protein  
994 through the cultivation of *Yarrowia lipolytica* on agro-industrial wastes and by-products.

- 995 Sustainability 12, 1398. <https://doi.org/10.3390/su12041398>
- 996 Pereira, P.H.F., Oliveira, T.Í.S., Rosa, M.F., Cavalcante, F.L., Moates, G.K., Wellner, N.,  
997 Waldron, K.W., Azeredo, H.M.C., 2016. Pectin extraction from pomegranate peels with  
998 citric acid. *Int. J. Biol. Macromol.* 88, 373-379.  
999 <https://doi.org/10.1016/j.ijbiomac.2016.03.074>
- 1000 Pocan, P., Bahcegul, E., Oztop, M.H., Hamamci, H., 2018. Enzymatic hydrolysis of fruit  
1001 peels and other lignocellulosic biomass as a source of sugar. *Waste and Biomass  
1002 Valorization.* 9, 929-937. <https://doi.org/10.1007/s12649-017-9875-3>
- 1003 Rastogi, M., Shrivastava, S., 2017. Recent advances in second generation bioethanol  
1004 production: An insight to pretreatment, saccharification and fermentation processes.  
1005 *Renew. Sustain. Energy Rev.* 80, 330–340. <https://doi.org/10.1016/j.rser.2017.05.225>
- 1006 Reichert, P., 1998. AQUASIM 2.0 - Computer Program for the identification and simulation  
1007 of aquatic systems - User Manual, Water Science and Technology.
- 1008 Roukas, T., Kotzekidou, P., 2020. Pomegranate peel waste: a new substrate for citric acid  
1009 production by *Aspergillus niger* in solid-state fermentation under non-aseptic conditions.  
1010 *Environ. Sci. Pollut. Res.* 27, 13105–13113. [https://doi.org/10.1007/s11356-020-07928-](https://doi.org/10.1007/s11356-020-07928-9)  
1011 9
- 1012 Sadh, P.K., Duhan, S., Duhan, J.S., 2018. Agro-industrial wastes and their utilization using  
1013 solid state fermentation: a review. *Bioresour. Bioprocess.* 5, 1.  
1014 <https://doi.org/10.1186/s40643-017-0187-z>
- 1015 Sánchez, Ó.J., Cardona, C.A., 2008. Trends in biotechnological production of fuel ethanol  
1016 from different feedstocks. *Bioresour. Technol.* 99, 5270–5295.  
1017 <https://doi.org/10.1016/j.biortech.2007.11.013>
- 1018 Santos, M.P., Souza, M.C., Sumere, B.R., da Silva, L.C., Cunha, D.T., Bezerra, R.M.N.,  
1019 Rostagno, M.A., 2019. Extraction of bioactive compounds from pomegranate peel  
1020 (*Punica granatum L.*) with pressurized liquids assisted by ultrasound combined with an  
1021 expansion gas. *Ultrason. Sonochem.* 54, 11–17.  
1022 <https://doi.org/10.1016/j.ultsonch.2019.02.021>

- 1023 Santosh, I., Ashtavinayak, P., Amol, D., Sanjay, P., 2017. Enhanced bioethanol production  
1024 from different sugarcane bagasse cultivars using co-culture of *Saccharomyces cerevisiae*  
1025 and *Scheffersomyces (Pichia) stipitis*. J. Environ. Chem. Eng. 5, 2861-2868.  
1026 <https://doi.org/10.1016/j.jece.2017.05.045>
- 1027 Sarkar, N., Ghosh, S.K., Bannerjee, S., Aikat, K., 2012. Bioethanol production from  
1028 agricultural wastes: An overview. Renew. Energy 37, 19–27.  
1029 <https://doi.org/10.1016/j.renene.2011.06.045>
- 1030 Sarris, D., Giannakis, M., Philippoussis, A., Komaitis, M., Koutinas, A.A., Papanikolaou, S.,  
1031 2013. Conversions of olive mill wastewater-based media by *Saccharomyces cerevisiae*  
1032 through sterile and non-sterile bioprocesses. J. Chem. Technol. Biotechnol. 88, 958–  
1033 969. <https://doi.org/10.1002/jctb.3931>
- 1034 Sarris, D., Kotseridis, Y., Linga, M., Galiotou-Panayotou, M., Papanikolaou, S., 2009.  
1035 Enhanced ethanol production, volatile compound biosynthesis and fungicide removal  
1036 during growth of a newly isolated *Saccharomyces cerevisiae* strain on enriched  
1037 pasteurized grape musts. Eng. Life Sci. 9, 29–37.  
1038 <https://doi.org/10.1002/elsc.200800059>
- 1039 Sarris, D., Matsakas, L., Aggelis, G., Koutinas, A.A., Papanikolaou, S., 2014. Aerated vs non-  
1040 aerated conversions of molasses and olive mill wastewaters blends into bioethanol by  
1041 *Saccharomyces cerevisiae* under non-aseptic conditions. Ind. Crops Prod. 56, 83–93.  
1042 <https://doi.org/10.1016/j.indcrop.2014.02.040>
- 1043 Sarris, D., Papanikolaou, S., 2016. Biotechnological production of ethanol: Biochemistry,  
1044 processes and technologies. Eng. Life Sci. 16, 307–329.  
1045 <https://doi.org/10.1002/elsc.201400199>
- 1046 Sena, L.M.F., Morais, C.G., Lopes, M.R., Santos, R.O., Uetanabaro, A.P.T., Morais, P.B.,  
1047 Vital, M.J.S., de Morais, M.A., Lachance, M.A., Rosa, C.A., 2017. d-Xylose  
1048 fermentation, xylitol production and xylanase activities by seven new species of  
1049 *Sugiyamaella*. Antonie van Leeuwenhoek, Int. J. Gen. Mol. Microbiol. 110, 53–67.  
1050 <https://doi.org/10.1007/s10482-016-0775-5>

- 1051 Sharma, P., McClees, S.F., Afaq, F., 2017. Pomegranate for prevention and treatment of  
1052 cancer: An update. *Molecules*. 22, 177. <https://doi.org/10.3390/molecules22010177>
- 1053 Siddiqui, M.T.H., Nizamuddin, S., Mubarak, N.M., Shirin, K., Aijaz, M., Hussain, M.,  
1054 Baloch, H.A., 2019. Characterization and process optimization of biochar produced  
1055 using novel biomass, waste pomegranate peel: A response surface methodology  
1056 approach. *Waste and Biomass Valorization* 10, 521–532.  
1057 <https://doi.org/10.1007/s12649-017-0091-y>
- 1058 Singh, A., Sharma, P., Saran, A.K., Singh, N., Bishnoi, N.R., 2013. Comparative study on  
1059 ethanol production from pretreated sugarcane bagasse using immobilized  
1060 *Saccharomyces cerevisiae* on various matrices. *Renew. Energy*. 50, 488-493.  
1061 <https://doi.org/10.1016/j.renene.2012.07.003>
- 1062 Singh, J., Gu, S., 2010. Commercialization potential of microalgae for biofuels production.  
1063 *Renew. Sustain. Energy Rev.* 14, 2596–2610. <https://doi.org/10.1016/j.rser.2010.06.014>
- 1064 Sitepu, I.R., Sestric, R., Ignatia, L., Levin, D., German, J.B., Gillies, L.A., Almada, L.A.G.,  
1065 Boundy-Mills, K.L., 2013. Manipulation of culture conditions alters lipid content and  
1066 fatty acid profiles of a wide variety of known and new oleaginous yeast species.  
1067 *Bioresour. Technol.* 144, 360–369. <https://doi.org/10.1016/j.biortech.2013.06.047>
- 1068 Slaný, O., Klemková, T., Marcinčák, S., Čertík, M., 2020. Production of high-value  
1069 bioproducts enriched with  $\gamma$ -linolenic acid and  $\beta$ -carotene by filamentous fungi  
1070 *Umbelopsis isabellina* using solid-state fermentations. *Ann. Microbiol.* 70, 17.  
1071 <https://doi.org/10.1186/s13213-020-01559-8>
- 1072 Slaný, O., Klemková, T., Shapaval, V., Zimmermann, B., Kohler, A., Čertík, M., 2021.  
1073 Animal fat as a substrate for production of n-6 fatty acids by fungal solid-state  
1074 fermentation. *Microorganisms* 9, 170. <https://doi.org/10.3390/microorganisms9010170>
- 1075 Slininger, P.J., Dien, B.S., Kurtzman, C.P., Moser, B.R., Bakota, E.L., Thompson, S.R.,  
1076 O'Bryan, P.J., Cotta, M.A., Balan, V., Jin, M., Sousa, L. da C., Dale, B.E., 2016.  
1077 Comparative lipid production by oleaginous yeasts in hydrolyzates of lignocellulosic  
1078 biomass and process strategy for high titers. *Biotechnol. Bioeng.* 113, 1676-1690.

- 1079 <https://doi.org/10.1002/bit.25928>
- 1080 Sood, A., Gupta, M., 2015. Extraction process optimization for bioactive compounds in  
1081 pomegranate peel. *Food Biosci.* 12, 100–106. <https://doi.org/10.1016/j.fbio.2015.09.004>
- 1082 Tian, S.-Q., Chen, Z.-C., 2016. Dynamic analysis of bioethanol production from corn stover  
1083 and immobilized yeast. *BioResources* 11. [https://doi.org/10.15376/biores.11.3.6040-](https://doi.org/10.15376/biores.11.3.6040-6049)  
1084 6049
- 1085 Tsioulpas, A., Dimou, D., Iconomou, D., Aggelis, G., 2002. Phenolic removal in olive oil mill  
1086 wastewater by strains of *Pleurotus* spp. in respect to their phenol oxidase (laccase)  
1087 activity. *Bioresour. Technol.* 84, 251–257. [https://doi.org/10.1016/S0960-](https://doi.org/10.1016/S0960-8524(02)00043-3)  
1088 8524(02)00043-3
- 1089 Türkyılmaz, M., Tağı, Ş., Dereli, U., Özkan, M., 2013. Effects of various pressing programs  
1090 and yields on the antioxidant activity, antimicrobial activity, phenolic content and colour  
1091 of pomegranate juices. *Food Chem.* 138, 1810–1818.  
1092 <https://doi.org/10.1016/j.foodchem.2012.11.100>
- 1093 Valdés, G., Mendonça, R.T., Aggelis, G., 2020a. Lignocellulosic biomass as a substrate for  
1094 oleaginous microorganisms: A review. *Appl. Sci.* 10, 7698.  
1095 <https://doi.org/10.3390/app10217698>
- 1096 Valdés, G., Mendonça, R.T., Parra, C., Aggelis, G., 2020b. Patterns of lignocellulosic sugar  
1097 assimilation and lipid production by newly isolated yeast strains from Chilean Valdivian  
1098 Forest. *Appl. Biochem. Biotechnol.* 192, 1124–1146. [https://doi.org/10.1007/s12010-](https://doi.org/10.1007/s12010-020-03398-4)  
1099 020-03398-4
- 1100 Vasaki, M., Karri, R.R., Ravindran, G., Paramasivan, B., 2021. Predictive capability  
1101 evaluation and optimization of sustainable biodiesel production from oleaginous  
1102 biomass grown on pulp and paper industrial wastewater. *Renew. Energy* 168, 204–215.  
1103 <https://doi.org/10.1016/j.renene.2020.12.038>
- 1104 Volkman, J.K., 2003. Sterols in microorganisms. *Appl. Microbiol. Biotechnol.* 60, 495–506.  
1105 <https://doi.org/10.1007/s00253-002-1172-8>
- 1106 Wei, Y., Siewers, V., Nielsen, J., 2017. Cocoa butter-like lipid production ability of non-

- 1107 oleaginous and oleaginous yeasts under nitrogen-limited culture conditions. Appl.  
1108 Microbiol. Biotechnol. 101, 3577–3585. <https://doi.org/10.1007/s00253-017-8126-7>
- 1109 Xu, M., Ran, L., Chen, N., Fan, X., Ren, D., Yi, L., 2019. Polarity-dependent extraction of  
1110 flavonoids from citrus peel waste using a tailor-made deep eutectic solvent. Food Chem.  
1111 297, 124970. <https://doi.org/10.1016/j.foodchem.2019.124970>
- 1112 Yan, W., Gao, H., Qian, X., Jiang, Y., Zhou, J., Dong, W., Xin, F., Zhang, W., Jiang, M.,  
1113 2021. Biotechnological applications of the non-conventional yeast *Meyerozyma*  
1114 *guilliermondii*. Biotechnol. Adv. 46, 107674.  
1115 <https://doi.org/10.1016/j.biotechadv.2020.107674>
- 1116 Yook, S. Do, Kim, J., Gong, G., Ko, J.K., Um, Y., Han, S.O., Lee, S., 2020. High yield lipid  
1117 production from lignocellulosic biomass using engineered xylose-utilizing *Yarrowia*  
1118 *lipolytica*. GCB Bioenergy 12, 670–679. <https://doi.org/10.1111/gcbb.12699>
- 1119 Yu, Z., Du, Y., Shang, X., Zheng, Y., Zhou, J., 2018. Enhancing fermentable sugar yield from  
1120 cassava residue using a two-step dilute ultra-low acid pretreatment process. Ind. Crops  
1121 Prod. 124, 555-562. <https://doi.org/10.1016/j.indcrop.2018.08.029>
- 1122 Zhai, X., Zhu, C., Li, Y., Zhang, Y., Duan, Z., Yang, X., 2018a. Optimization for pectinase-  
1123 assisted extraction of polysaccharides from pomegranate peel with chemical  
1124 composition and antioxidant activity. Int. J. Biol. Macromol. 109, 244–253.  
1125 <https://doi.org/10.1016/j.ijbiomac.2017.12.064>
- 1126 Zhai, X., Zhu, C., Zhang, Y., Sun, J., Alim, A., Yang, X., 2018b. Chemical characteristics,  
1127 antioxidant capacities and hepatoprotection of polysaccharides from pomegranate peel.  
1128 Carbohydr. Polym. 202, 461–469. <https://doi.org/10.1016/j.carbpol.2018.09.013>
- 1129 Zhang, J., Bao, J., 2018. Lignocellulose pretreatment using acid as catalyst, in: Handbook of  
1130 biorefinery research and technology. [https://doi.org/10.1007/978-94-007-6724-9\\_3-1](https://doi.org/10.1007/978-94-007-6724-9_3-1)
- 1131 Zhao, X., Kong, X., Hua, Y., Feng, B., Zhao, Z., 2008. Medium optimization for lipid  
1132 production through co-fermentation of glucose and xylose by the oleaginous yeast  
1133 *Lipomyces starkeyi*. Eur. J. Lipid Sci. Technol. 110, 405-412.  
1134 <https://doi.org/10.1002/ejlt.200700224>



- 1135     Zhu, C., Liu, X., 2013. Optimization of extraction process of crude polysaccharides from  
1136             Pomegranate peel by response surface methodology. *Carbohydr. Polym.* 92, 1197–1202.  
1137             <https://doi.org/10.1016/j.carbpol.2012.10.073>  
1138

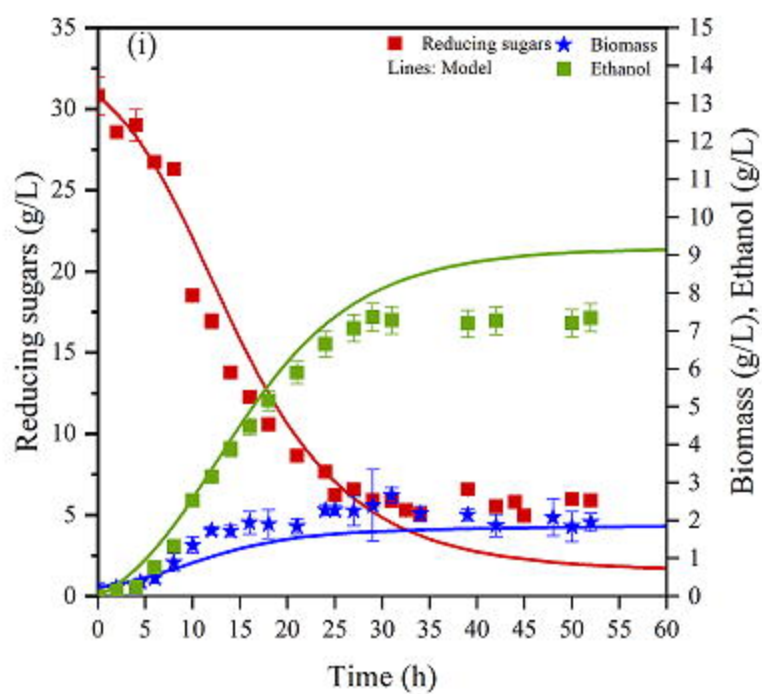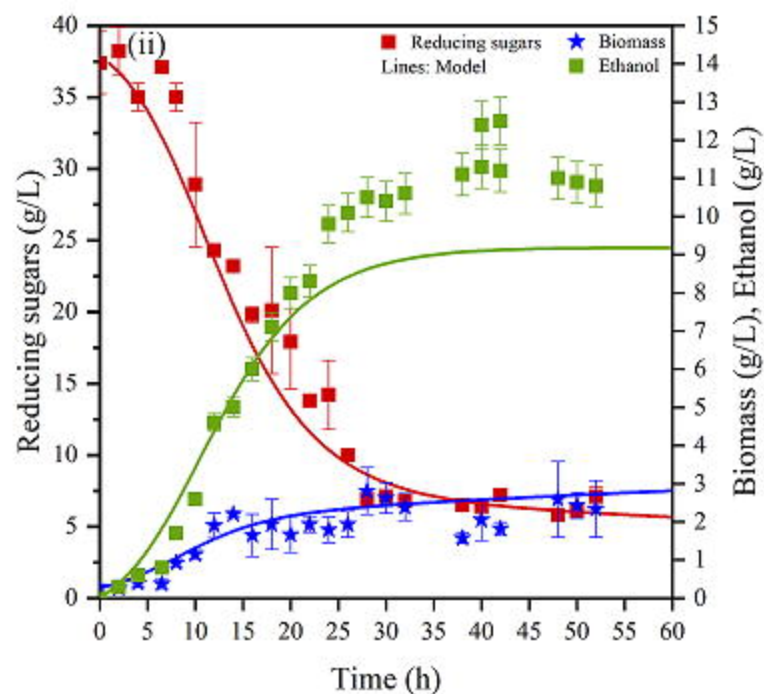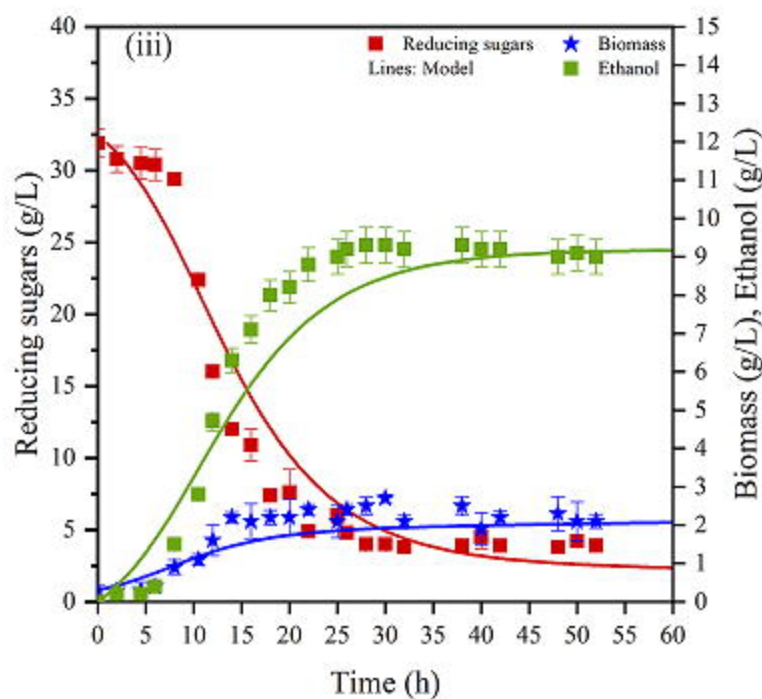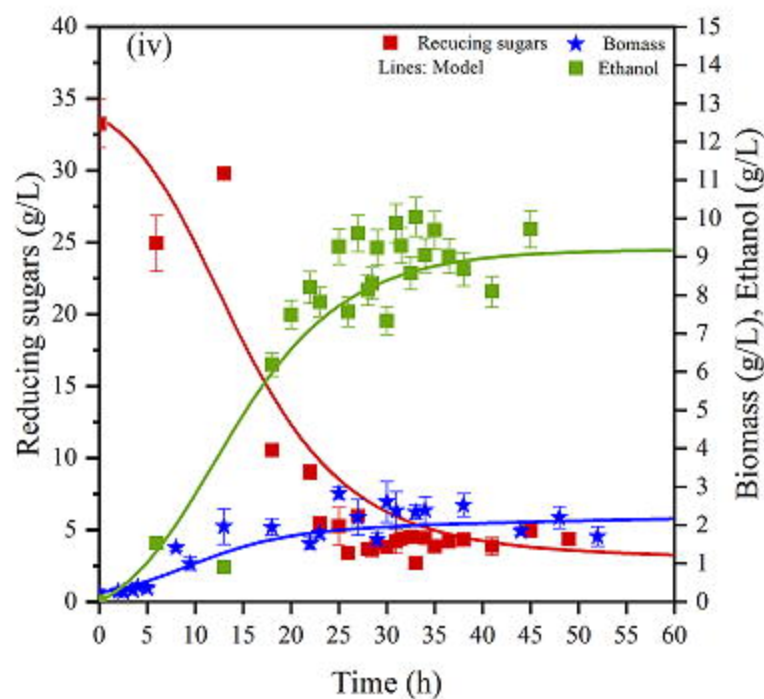

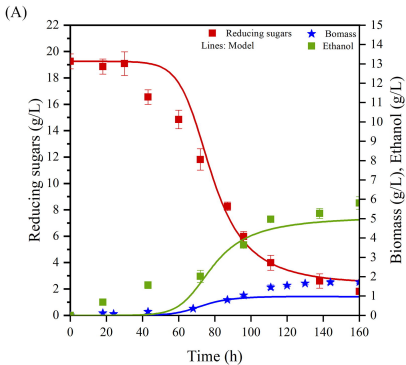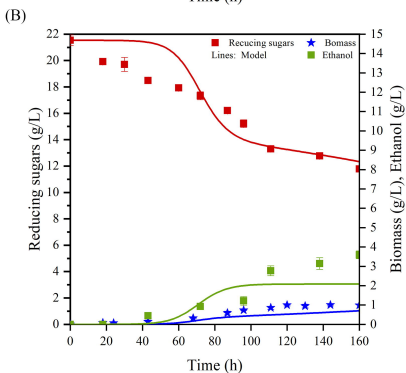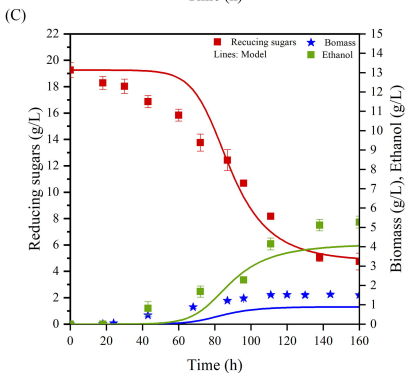

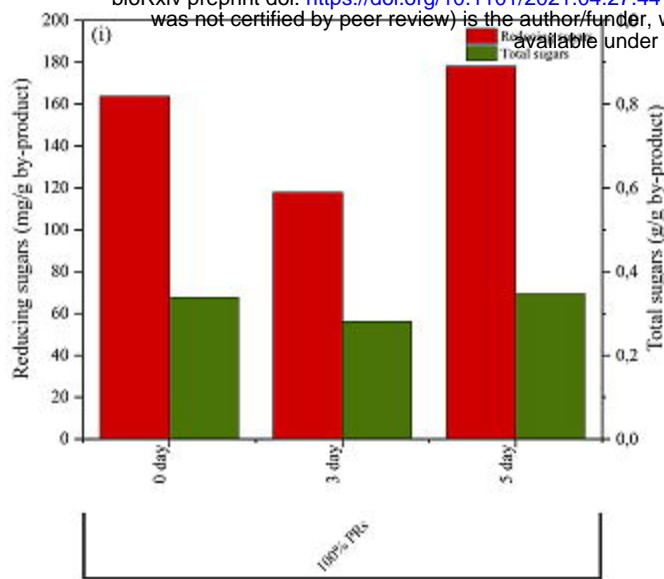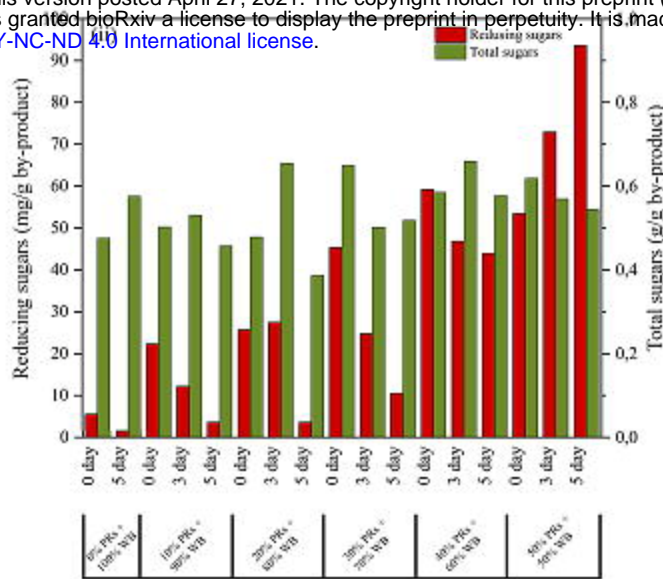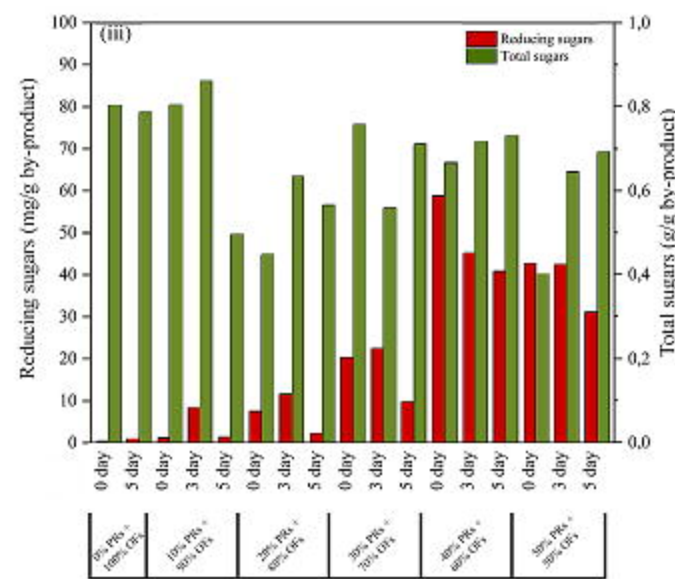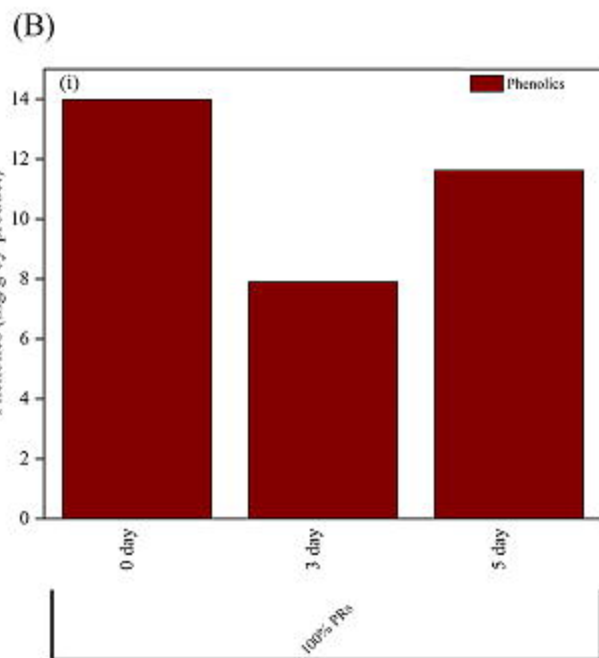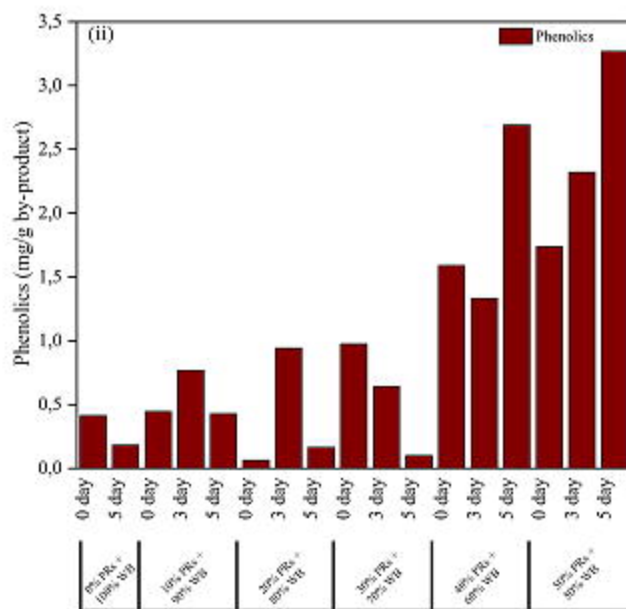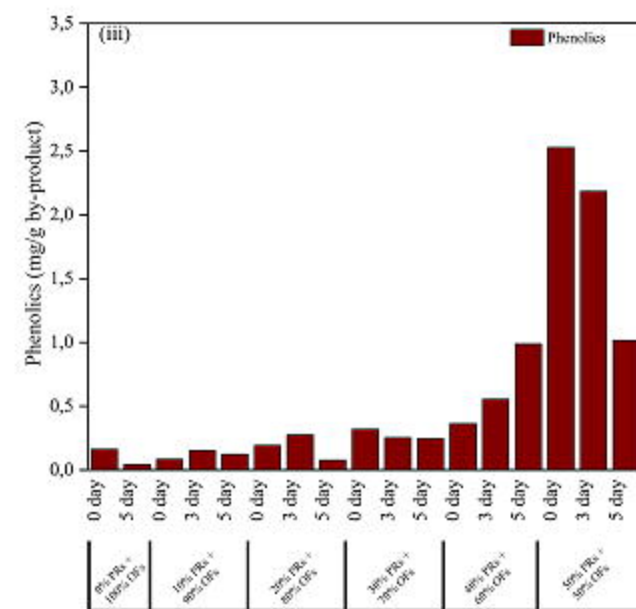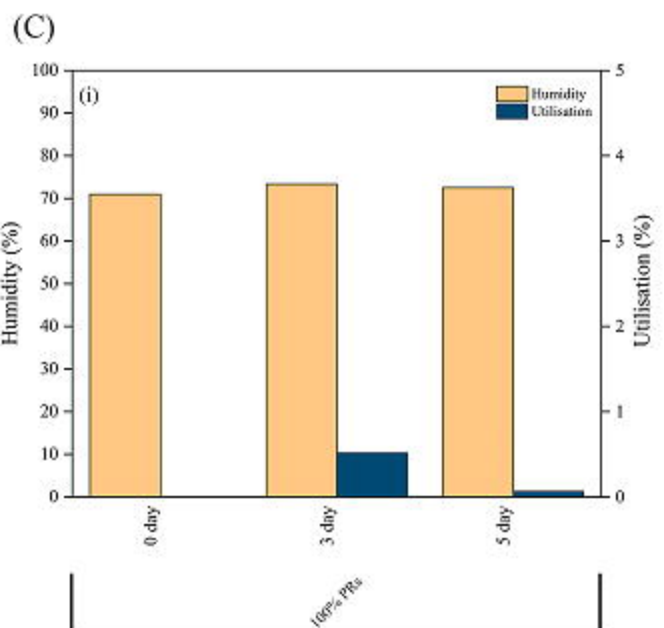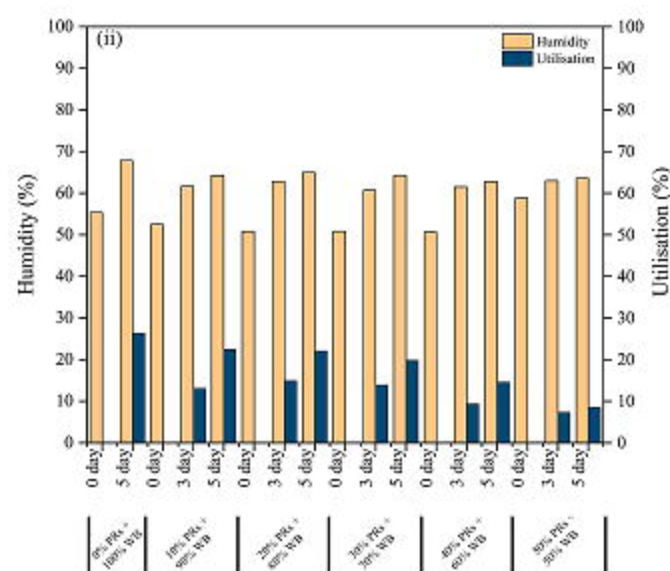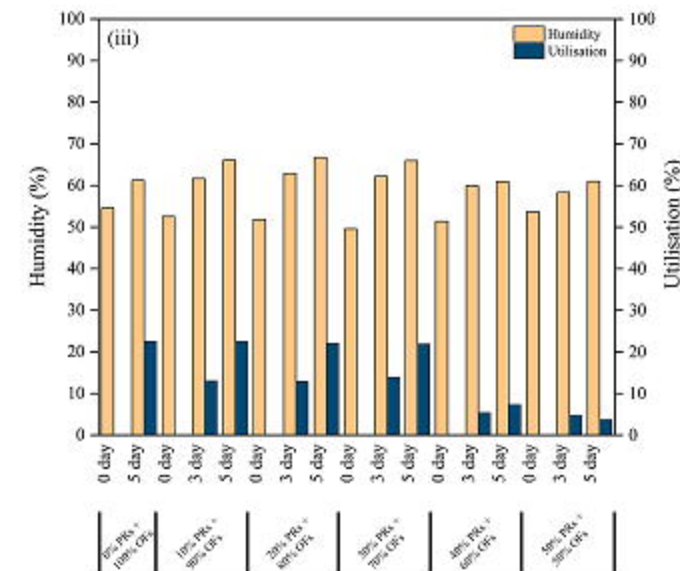

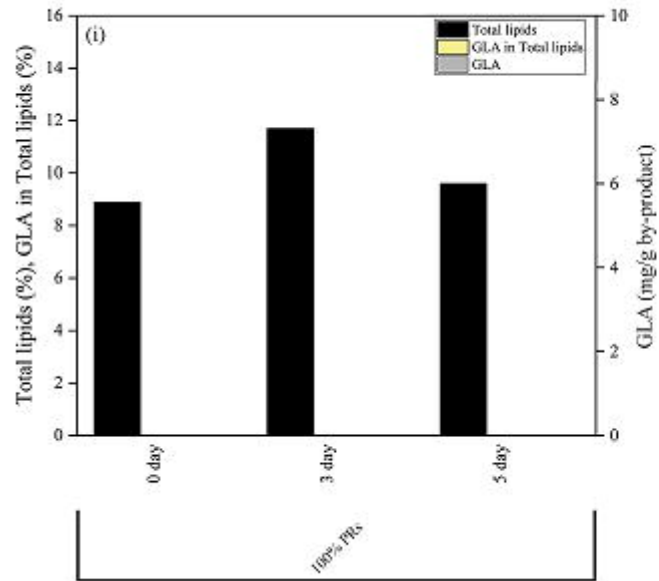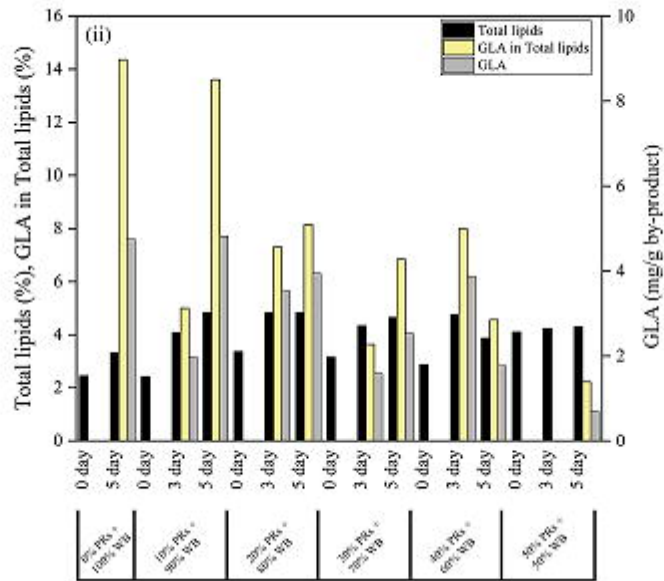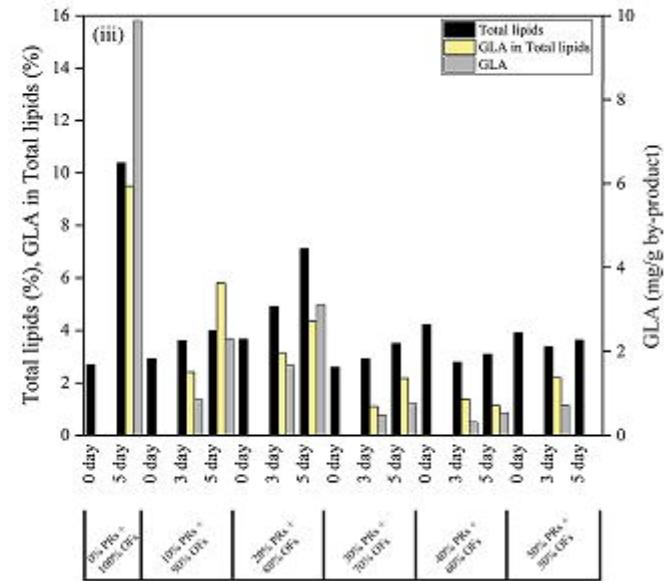



100

90

80

70

60

50

40

30

20

10

0

non-polar lipids (%)

bioRxiv preprint doi: <https://doi.org/10.1101/2021.04.27.441664>; this version posted April 27, 2021. The copyright holder for this preprint (which was not certified by peer review) is the author/funder, who has granted bioRxiv a license to display the preprint in perpetuity. It is made available under aCC-BY-NC-ND 4.0 International license.

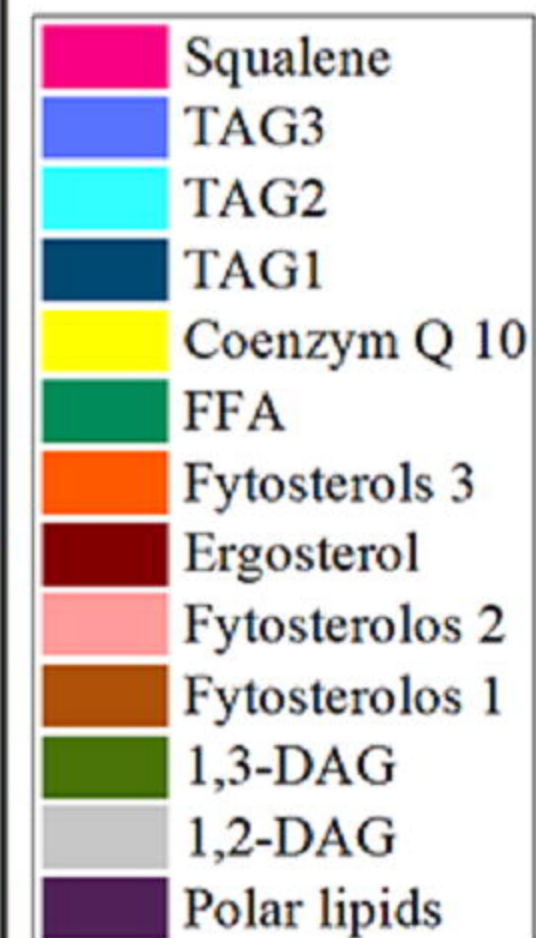

100% PRs

100% WB

100% OFs

10% PRs + 90% WB

20% PRs + 80% WB

30% PRs + 70% WB

40% PRs + 60% WB

50% PRs + 50% WB

10% PRs + 10% OFs

20% PRs + 80% OFs

30% PRs + 70% OFs

40% PRs + 60% OFs

50% PRs + 50% OFs
